# Supplementary material for: Study of host–guest interactions in benzodiazacoronands by means of solid state NMR spectroscopy, X-ray diffraction and quantum mechanical computations
Source: Royal Society of Chemistry journal article supplement (doi:10.1039/c0cp02401e), 2011-01-01
Supplement: c0cp02401e.pdf [file c0cp02401e.pdf]

**Study of host-guest interactions in  
benzodiazacoronands by means of solid state NMR  
spectroscopy, X-Ray diffraction and quantum  
mechanical computations.**

Katarzyna Nowicka, Anna Bujacz, Piotr Paluch, Adam Sobczuk, Agata Jeziorna,  
Włodzimierz Ciesielski, Grzegorz D. Bujacz, Janusz Jurczak\* and Marek J. Potrzebowski†

---

\* Electronic address: [jurczak@icho.edu.pl](mailto:jurczak@icho.edu.pl)

† Electronic address: [marekpot@cbmm.lodz.pl](mailto:marekpot@cbmm.lodz.pl)

1) X-ray structure of complexes 1 with full numbering system

a) Structure 1d

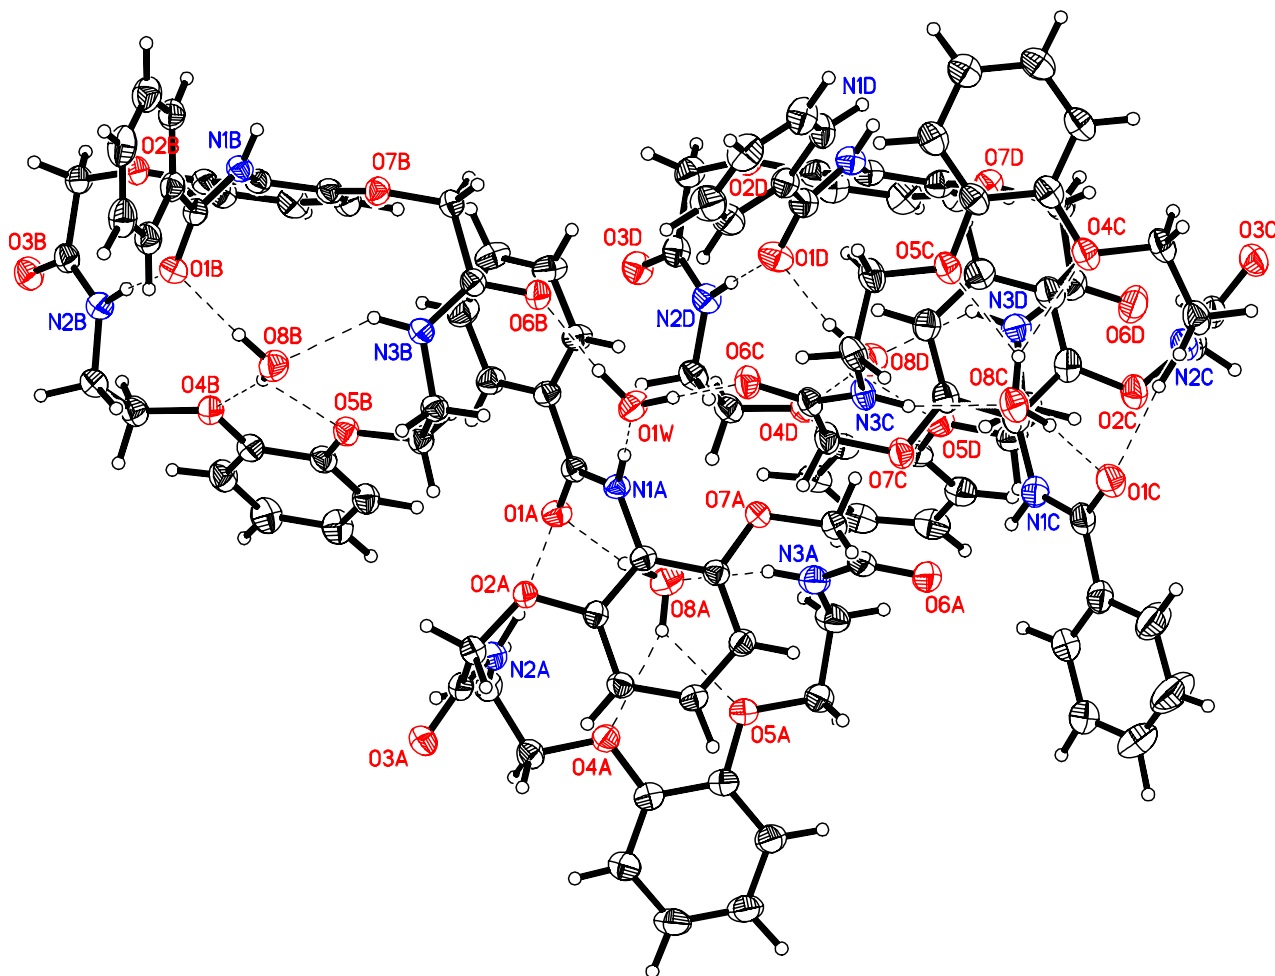

b) Structure 1c

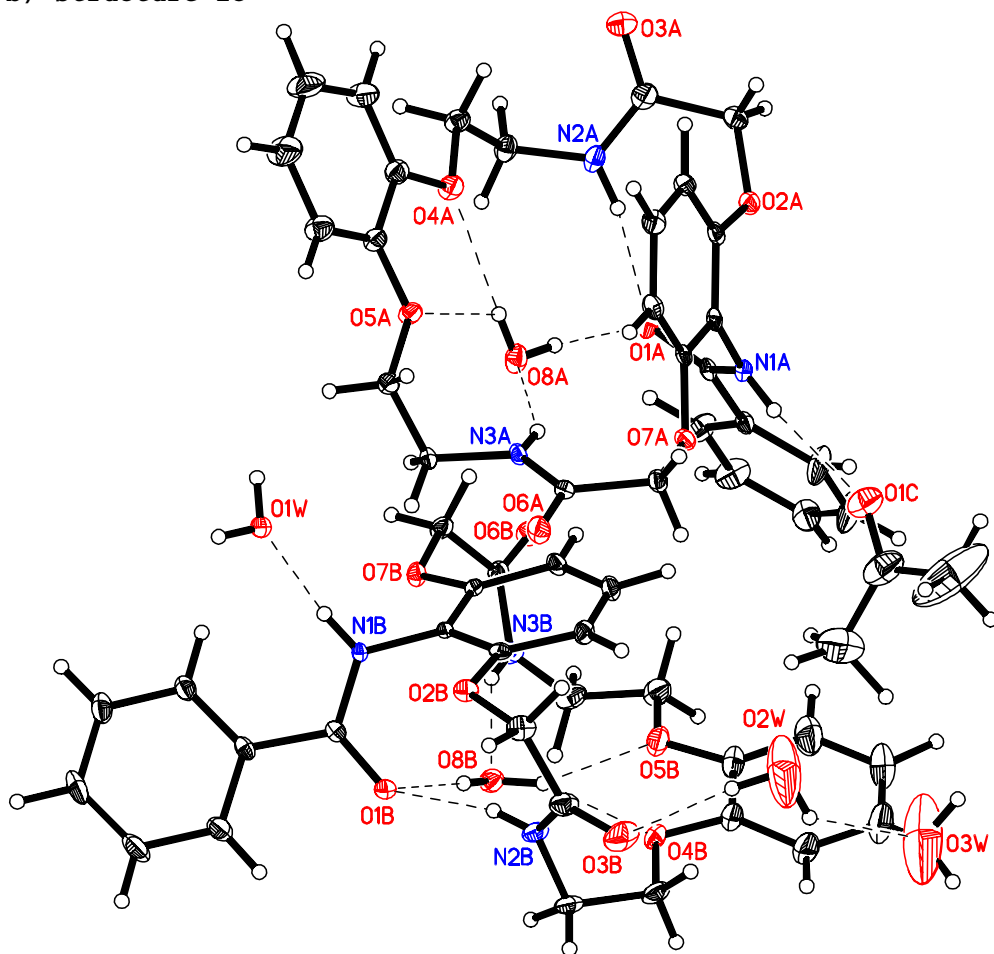

c) Structure 1b

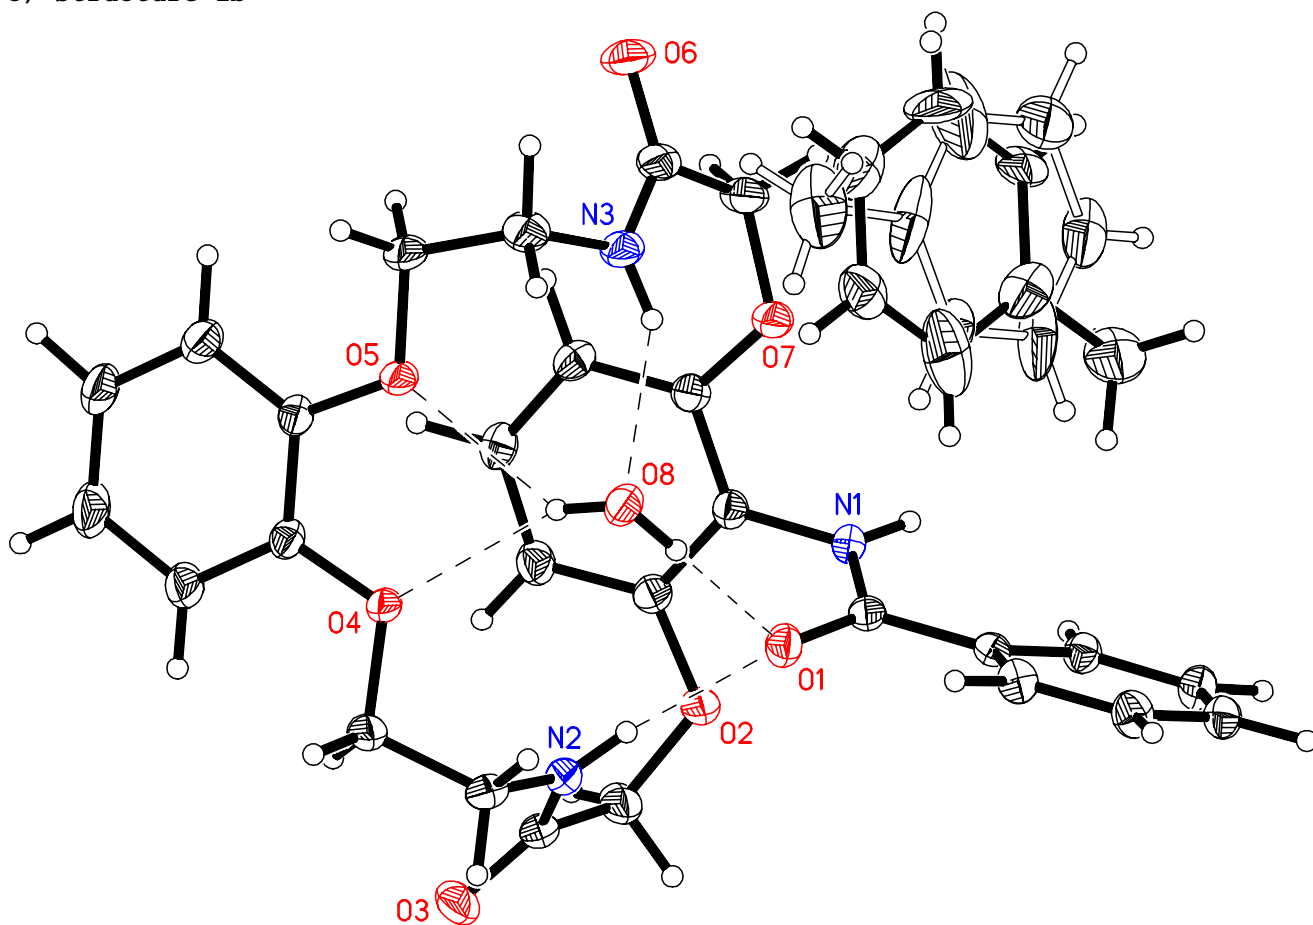

2) Input files with structure of clusters used for DFT GIAO calculations.

a) Structure of cluster for Sample crystallized from methanol 1a)

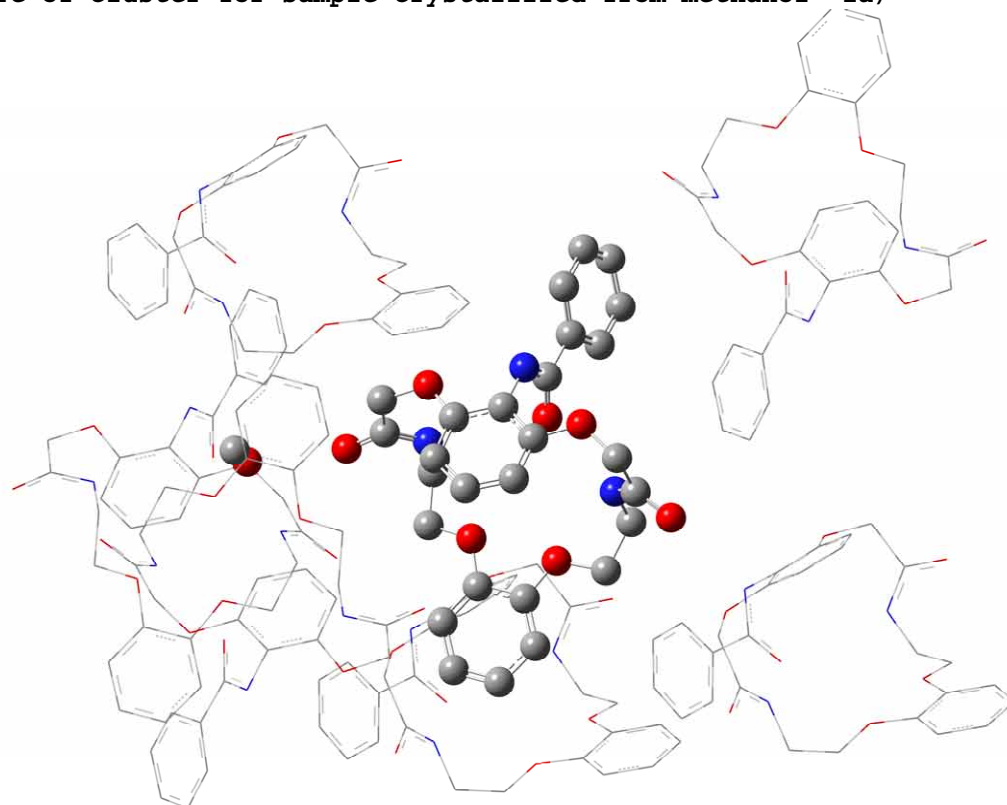

b) Structure of cluster for Sample crystallized from toluene 1b)

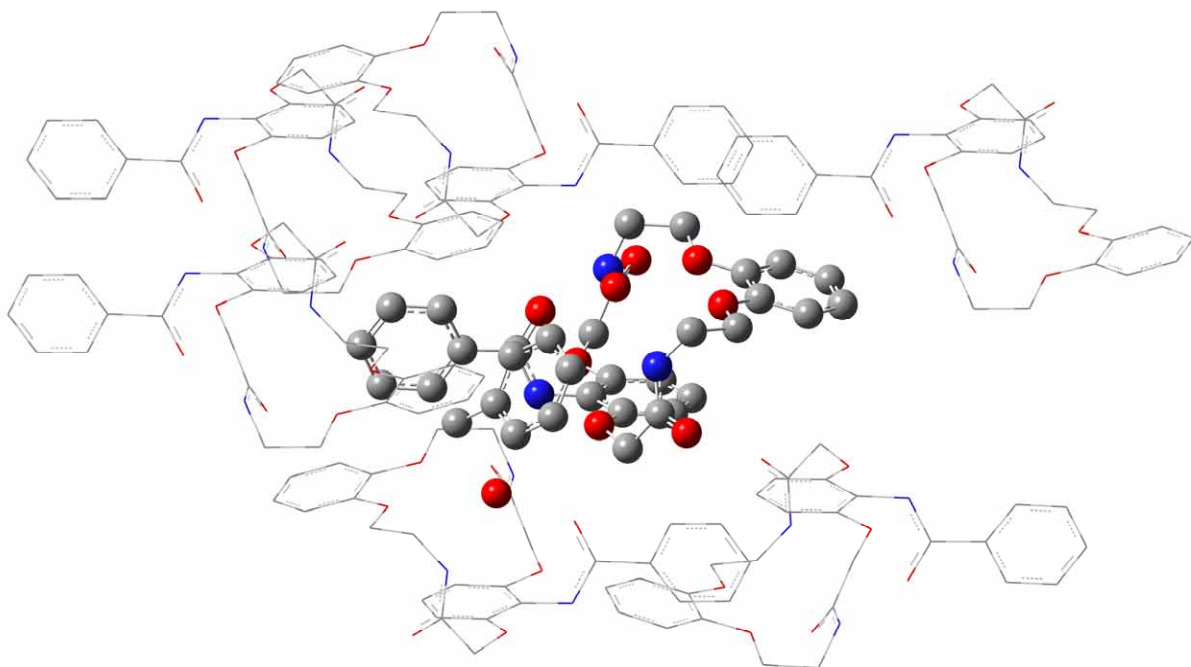

c) Structure of cluster for Sample crystallized from acetone 1c)

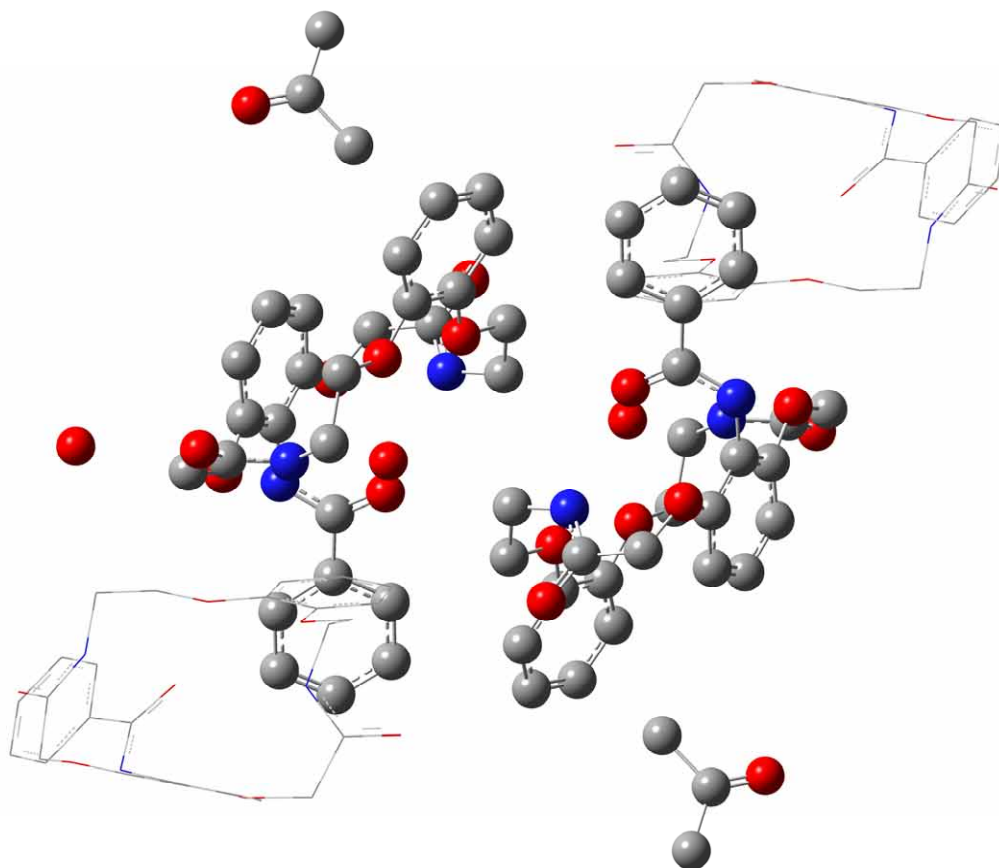

d) Gaussian input files for Sample crystallized from methanol 1a)

```
%chk=koron_219_metanol.chk  
%mem=4048MB  
%nproc=4  
# NMR oniom(b3lyp/6-311++g(d,p):uff)
```

Sample crystallized from methanol 1a)

```
0 1 0 1 0 1  
O-O_3      0    2.115574    1.681644    0.867345 H  
O-O_3      0   -0.965419    3.042701    2.399130 H  
O-O_3      0   -3.476127    1.254929    0.569543 H  
O-O_3      0   -0.295298   -1.516482    0.481810 H  
O-O_3      0    2.030355   -2.240930    1.219610 H  
O-O_3      0    5.436022   -1.008142    3.796802 H  
O-O_3      0    3.230358    1.792551    3.939725 H  
N-N_3      0    1.710739    3.300333    2.355188 H  
N-N_3      0   -1.244211    1.238525    0.369449 H  
N-N_3      0    3.869963   -0.332971    2.330585 H  
C-C_3      0    3.629840    3.372824   -0.768327 H  
C-C_3      0    4.239712    4.258479   -1.640900 H  
C-C_3      0    4.092510    5.614926   -1.488300 H  
C-C_3      0    3.451037    6.086244   -0.405412 H  
C-C_3      0    2.882523    5.212615    0.504085 H  
C-C_3      0    2.934427    3.846401    0.323543 H  
C-C_3      0    2.232605    2.857839    1.194587 H  
C-C_3      0    1.093109    2.364157    3.239646 H  
C-C_3      0    1.882336    1.542887    4.042771 H  
C-C_3      0    1.301040    0.567503    4.827215 H  
C-C_3      0   -0.057359    0.410192    4.795460 H  
C-C_3      0   -0.862360    1.205620    4.011743 H  
C-C_3      0   -0.284992    2.193789    3.234975 H  
C-C_3      0   -2.292121    2.694196    2.013496 H  
C-C_3      0   -2.365270    1.662069    0.920971 H  
C-C_3      0   -1.255690    0.255389   -0.698740 H  
C-C_3      0   -1.476953   -1.136973   -0.208208 H  
C-C_3      0   -0.210617   -2.797170    0.959121 H  
C-C_3      0   -1.257640   -3.684582    1.046846 H  
C-C_3      0   -1.044599   -4.966548    1.521901 H  
C-C_3      0    0.196195   -5.362287    1.891634 H  
C-C_3      0    1.266283   -4.473438    1.806509 H  
C-C_3      0    1.070390   -3.192397    1.344146 H  
C-C_3      0    3.378607   -2.588730    1.502593 H  
C-C_3      0    4.180218   -1.340965    1.330071 H  
C-C_3      0    4.513969   -0.250729    3.475831 H  
C-C_3      0    4.153120    0.839273    4.451487 H  
O-O_3      0   -6.196229    1.194158    1.110062 H  
C-C_3      0   -6.425785    1.697781    2.393275 H  
O-O_3      0   -7.528003    0.605910   -5.267548 L  
O-O_3      0  -10.608996    1.966966   -3.735763 L  
O-O_3      0  -13.119704    0.179195   -5.565350 L  
O-O_3      0   -9.938876   -2.592217   -5.653083 L  
O-O_3      0   -7.613222   -3.316664   -4.915283 L  
O-O_3      0   -4.207555   -2.083876   -2.338091 L  
O-O_3      0   -6.413219    0.716817   -2.195168 L  
N-N_3      0   -7.932838    2.224599   -3.779705 L  
N-N_3      0  -10.887788    0.162791   -5.765444 L  
N-N_3      0   -5.773614   -1.408705   -3.804307 L
```



|       |   |            |           |           |   |
|-------|---|------------|-----------|-----------|---|
| C-C_3 | 0 | -6.013737  | 2.297089  | -6.903220 | L |
| C-C_3 | 0 | -5.403865  | 3.182744  | -7.775793 | L |
| C-C_3 | 0 | -5.551068  | 4.539191  | -7.623193 | L |
| C-C_3 | 0 | -6.192540  | 5.010509  | -6.540305 | L |
| C-C_3 | 0 | -6.761054  | 4.136880  | -5.630808 | L |
| C-C_3 | 0 | -6.709150  | 2.770667  | -5.811350 | L |
| C-C_3 | 0 | -7.410972  | 1.782105  | -4.940306 | L |
| C-C_3 | 0 | -8.550468  | 1.288422  | -2.895247 | L |
| C-C_3 | 0 | -7.761241  | 0.467153  | -2.092122 | L |
| C-C_3 | 0 | -8.342537  | -0.508232 | -1.307678 | L |
| C-C_3 | 0 | -9.700936  | -0.665542 | -1.339433 | L |
| C-C_3 | 0 | -10.505937 | 0.129886  | -2.123150 | L |
| C-C_3 | 0 | -9.928569  | 1.118054  | -2.899918 | L |
| C-C_3 | 0 | -11.935698 | 1.618461  | -4.121397 | L |
| C-C_3 | 0 | -12.008847 | 0.586335  | -5.213922 | L |
| C-C_3 | 0 | -10.899267 | -0.820345 | -6.833633 | L |
| C-C_3 | 0 | -11.120531 | -2.212707 | -6.343101 | L |
| C-C_3 | 0 | -9.854195  | -3.872905 | -5.175772 | L |
| C-C_3 | 0 | -10.901217 | -4.760317 | -5.088047 | L |
| C-C_3 | 0 | -10.688177 | -6.042283 | -4.612992 | L |
| C-C_3 | 0 | -9.447382  | -6.438021 | -4.243259 | L |
| C-C_3 | 0 | -8.377294  | -5.549172 | -4.328383 | L |
| C-C_3 | 0 | -8.573187  | -4.268131 | -4.790746 | L |
| C-C_3 | 0 | -6.264971  | -3.664464 | -4.632300 | L |
| C-C_3 | 0 | -5.463359  | -2.416699 | -4.804822 | L |
| C-C_3 | 0 | -5.129608  | -1.326464 | -2.659062 | L |
| C-C_3 | 0 | -5.490457  | -0.236462 | -1.683406 | L |
| O-O_3 | 0 | -6.938910  | -2.994239 | 6.433556  | L |
| O-O_3 | 0 | -3.857917  | -4.355296 | 4.901771  | L |
| O-O_3 | 0 | -1.347209  | -2.567524 | 6.731358  | L |
| O-O_3 | 0 | -4.528037  | 0.203887  | 6.819091  | L |
| O-O_3 | 0 | -6.853691  | 0.928335  | 6.081291  | L |
| O-O_3 | 0 | -10.259358 | -0.304453 | 3.504100  | L |
| O-O_3 | 0 | -8.053694  | -3.105146 | 3.361176  | L |
| N-N_3 | 0 | -6.534075  | -4.612928 | 4.945713  | L |
| N-N_3 | 0 | -3.579125  | -2.551120 | 6.931452  | L |
| N-N_3 | 0 | -8.693299  | -0.979624 | 4.970316  | L |
| C-C_3 | 0 | -8.453176  | -4.685419 | 8.069228  | L |
| C-C_3 | 0 | -9.063048  | -5.571074 | 8.941801  | L |
| C-C_3 | 0 | -8.915845  | -6.927521 | 8.789201  | L |
| C-C_3 | 0 | -8.274373  | -7.398839 | 7.706313  | L |
| C-C_3 | 0 | -7.705859  | -6.525210 | 6.796816  | L |
| C-C_3 | 0 | -7.757763  | -5.158996 | 6.977358  | L |
| C-C_3 | 0 | -7.055941  | -4.170434 | 6.106314  | L |
| C-C_3 | 0 | -5.916445  | -3.676752 | 4.061255  | L |
| C-C_3 | 0 | -6.705672  | -2.855482 | 3.258130  | L |
| C-C_3 | 0 | -6.124376  | -1.880098 | 2.473686  | L |
| C-C_3 | 0 | -4.765977  | -1.722787 | 2.505441  | L |
| C-C_3 | 0 | -3.960976  | -2.518215 | 3.289158  | L |
| C-C_3 | 0 | -4.538344  | -3.506384 | 4.065926  | L |
| C-C_3 | 0 | -2.531215  | -4.006791 | 5.287405  | L |
| C-C_3 | 0 | -2.458066  | -2.974664 | 6.379930  | L |
| C-C_3 | 0 | -3.567646  | -1.567984 | 7.999641  | L |
| C-C_3 | 0 | -3.346382  | -0.175622 | 7.509109  | L |
| C-C_3 | 0 | -4.612718  | 1.484575  | 6.341780  | L |
| C-C_3 | 0 | -3.565696  | 2.371987  | 6.254055  | L |
| C-C_3 | 0 | -3.778736  | 3.653953  | 5.779000  | L |
| C-C_3 | 0 | -5.019531  | 4.049691  | 5.409267  | L |
| C-C_3 | 0 | -6.089619  | 3.160843  | 5.494392  | L |
| C-C_3 | 0 | -5.893726  | 1.879802  | 5.956755  | L |
| C-C_3 | 0 | -8.201942  | 1.276135  | 5.798308  | L |

|       |   |           |           |           |   |
|-------|---|-----------|-----------|-----------|---|
| C-C_3 | 0 | -9.003554 | 0.028370  | 5.970830  | L |
| C-C_3 | 0 | -9.337305 | -1.061866 | 3.825070  | L |
| C-C_3 | 0 | -8.976456 | -2.151868 | 2.849414  | L |
| O-O_3 | 0 | -1.591669 | -6.372940 | -2.792265 | L |
| O-O_3 | 0 | -0.085133 | -2.995281 | -2.680044 | L |
| O-O_3 | 0 | 3.283109  | -3.788469 | -1.745871 | L |
| O-O_3 | 0 | 2.185664  | -7.287512 | -3.833550 | L |
| O-O_3 | 0 | 0.530153  | -8.580023 | -5.271094 | L |
| O-O_3 | 0 | -3.412923 | -8.195350 | -7.287139 | L |
| O-O_3 | 0 | -3.141824 | -5.173492 | -5.410042 | L |
| N-N_3 | 0 | -2.412084 | -4.303938 | -3.000734 | L |
| N-N_3 | 0 | 1.497960  | -5.116542 | -2.012310 | L |
| N-N_3 | 0 | -2.217664 | -7.754506 | -5.433744 | L |
| C-C_3 | 0 | -3.440976 | -7.055731 | -0.806752 | L |
| C-C_3 | 0 | -4.256125 | -7.323291 | 0.280308  | L |
| C-C_3 | 0 | -4.896370 | -6.309984 | 0.949797  | L |
| C-C_3 | 0 | -4.827256 | -5.058648 | 0.464550  | L |
| C-C_3 | 0 | -4.059431 | -4.784896 | -0.653062 | L |
| C-C_3 | 0 | -3.330530 | -5.768706 | -1.287815 | L |
| C-C_3 | 0 | -2.384024 | -5.516583 | -2.414352 | L |
| C-C_3 | 0 | -1.565447 | -4.056834 | -4.124346 | L |
| C-C_3 | 0 | -1.920158 | -4.543529 | -5.381151 | L |
| C-C_3 | 0 | -1.063419 | -4.397157 | -6.453204 | L |
| C-C_3 | 0 | 0.142150  | -3.779865 | -6.261868 | L |
| C-C_3 | 0 | 0.520076  | -3.289906 | -5.032211 | L |
| C-C_3 | 0 | -0.341720 | -3.422021 | -3.958452 | L |
| C-C_3 | 0 | 1.264025  | -2.714100 | -2.317717 | L |
| C-C_3 | 0 | 2.085909  | -3.935738 | -2.007142 | L |
| C-C_3 | 0 | 2.238266  | -6.327170 | -1.705111 | L |
| C-C_3 | 0 | 3.079801  | -6.801404 | -2.843173 | L |
| C-C_3 | 0 | 2.718264  | -7.864687 | -4.955410 | L |
| C-C_3 | 0 | 4.040130  | -7.804484 | -5.330119 | L |
| C-C_3 | 0 | 4.468481  | -8.452942 | -6.474897 | L |
| C-C_3 | 0 | 3.594797  | -9.161853 | -7.227816 | L |
| C-C_3 | 0 | 2.252597  | -9.231975 | -6.858701 | L |
| C-C_3 | 0 | 1.808342  | -8.586155 | -5.727944 | L |
| C-C_3 | 0 | -0.441459 | -9.365816 | -5.947355 | L |
| C-C_3 | 0 | -1.740645 | -9.116005 | -5.255278 | L |
| C-C_3 | 0 | -3.005066 | -7.405160 | -6.429258 | L |
| C-C_3 | 0 | -3.480248 | -5.978922 | -6.531954 | L |
| O-O_3 | 0 | -5.960981 | 6.777581  | 1.770052  | L |
| O-O_3 | 0 | -4.454445 | 10.155241 | 1.882273  | L |
| O-O_3 | 0 | -1.086203 | 9.362052  | 2.816445  | L |
| O-O_3 | 0 | -2.183648 | 5.863009  | 0.728767  | L |
| O-O_3 | 0 | -3.839159 | 4.570498  | -0.708778 | L |
| O-O_3 | 0 | -7.782234 | 4.955171  | -2.724822 | L |
| O-O_3 | 0 | -7.511136 | 7.977030  | -0.847725 | L |
| N-N_3 | 0 | -6.781396 | 8.846584  | 1.561582  | L |
| N-N_3 | 0 | -2.871351 | 8.033980  | 2.550007  | L |
| N-N_3 | 0 | -6.586976 | 5.396016  | -0.871427 | L |
| C-C_3 | 0 | -7.810288 | 6.094791  | 3.755565  | L |
| C-C_3 | 0 | -8.625437 | 5.827231  | 4.842625  | L |
| C-C_3 | 0 | -9.265682 | 6.840538  | 5.512114  | L |
| C-C_3 | 0 | -9.196568 | 8.091874  | 5.026867  | L |
| C-C_3 | 0 | -8.428742 | 8.365625  | 3.909255  | L |
| C-C_3 | 0 | -7.699842 | 7.381815  | 3.274502  | L |
| C-C_3 | 0 | -6.753336 | 7.633939  | 2.147965  | L |
| C-C_3 | 0 | -5.934759 | 9.093687  | 0.437970  | L |
| C-C_3 | 0 | -6.289469 | 8.606992  | -0.818834 | L |
| C-C_3 | 0 | -5.432731 | 8.753365  | -1.890887 | L |
| C-C_3 | 0 | -4.227162 | 9.370657  | -1.699551 | L |

|       |   |           |           |           |   |
|-------|---|-----------|-----------|-----------|---|
| C-C_3 | 0 | -3.849236 | 9.860616  | -0.469894 | L |
| C-C_3 | 0 | -4.711032 | 9.728501  | 0.603865  | L |
| C-C_3 | 0 | -3.105287 | 10.436422 | 2.244600  | L |
| C-C_3 | 0 | -2.283403 | 9.214784  | 2.555175  | L |
| C-C_3 | 0 | -2.131046 | 6.823352  | 2.857206  | L |
| C-C_3 | 0 | -1.289511 | 6.349117  | 1.719144  | L |
| C-C_3 | 0 | -1.651047 | 5.285835  | -0.393093 | L |
| C-C_3 | 0 | -0.329182 | 5.346038  | -0.767802 | L |
| C-C_3 | 0 | 0.099169  | 4.697579  | -1.912580 | L |
| C-C_3 | 0 | -0.774515 | 3.988669  | -2.665500 | L |
| C-C_3 | 0 | -2.116715 | 3.918547  | -2.296384 | L |
| C-C_3 | 0 | -2.560970 | 4.564367  | -1.165627 | L |
| C-C_3 | 0 | -4.810771 | 3.784706  | -1.385039 | L |
| C-C_3 | 0 | -6.109957 | 4.034516  | -0.692962 | L |
| C-C_3 | 0 | -7.374378 | 5.745361  | -1.866942 | L |
| C-C_3 | 0 | -7.849560 | 7.171599  | -1.969637 | L |
| O-O_3 | 0 | 8.051908  | -5.297206 | 3.342628  | L |
| O-O_3 | 0 | 9.558444  | -1.919546 | 3.454849  | L |
| O-O_3 | 0 | 12.926686 | -2.712735 | 4.389022  | L |
| O-O_3 | 0 | 11.829241 | -6.211778 | 2.301343  | L |
| O-O_3 | 0 | 10.173730 | -7.504289 | 0.863798  | L |
| O-O_3 | 0 | 6.230654  | -7.119616 | -1.152246 | L |
| O-O_3 | 0 | 6.501753  | -4.097757 | 0.724851  | L |
| N-N_3 | 0 | 7.231493  | -3.228204 | 3.134159  | L |
| N-N_3 | 0 | 11.141537 | -4.040807 | 4.122583  | L |
| N-N_3 | 0 | 7.425913  | -6.678772 | 0.701149  | L |
| C-C_3 | 0 | 6.202601  | -5.979997 | 5.328141  | L |
| C-C_3 | 0 | 5.387452  | -6.247556 | 6.415201  | L |
| C-C_3 | 0 | 4.747207  | -5.234249 | 7.084690  | L |
| C-C_3 | 0 | 4.816321  | -3.982914 | 6.599443  | L |
| C-C_3 | 0 | 5.584146  | -3.709162 | 5.481831  | L |
| C-C_3 | 0 | 6.313047  | -4.692972 | 4.847078  | L |
| C-C_3 | 0 | 7.259553  | -4.440848 | 3.720541  | L |
| C-C_3 | 0 | 8.078130  | -2.981100 | 2.010546  | L |
| C-C_3 | 0 | 7.723419  | -3.467795 | 0.753742  | L |
| C-C_3 | 0 | 8.580158  | -3.321422 | -0.318311 | L |
| C-C_3 | 0 | 9.785727  | -2.704131 | -0.126975 | L |
| C-C_3 | 0 | 10.163653 | -2.214171 | 1.102682  | L |
| C-C_3 | 0 | 9.301857  | -2.346286 | 2.176441  | L |
| C-C_3 | 0 | 10.907602 | -1.638366 | 3.817176  | L |
| C-C_3 | 0 | 11.729486 | -2.860003 | 4.127751  | L |
| C-C_3 | 0 | 11.881843 | -5.251435 | 4.429782  | L |
| C-C_3 | 0 | 12.723378 | -5.725670 | 3.291720  | L |
| C-C_3 | 0 | 12.361842 | -6.788952 | 1.179483  | L |
| C-C_3 | 0 | 13.683707 | -6.728749 | 0.804774  | L |
| C-C_3 | 0 | 14.112058 | -7.377208 | -0.340004 | L |
| C-C_3 | 0 | 13.238374 | -8.086118 | -1.092923 | L |
| C-C_3 | 0 | 11.896174 | -8.156240 | -0.723808 | L |
| C-C_3 | 0 | 11.451919 | -7.510420 | 0.406949  | L |
| C-C_3 | 0 | 9.202118  | -8.290082 | 0.187538  | L |
| C-C_3 | 0 | 7.902932  | -8.040271 | 0.879614  | L |
| C-C_3 | 0 | 6.638511  | -6.329426 | -0.294365 | L |
| C-C_3 | 0 | 6.163329  | -4.903188 | -0.397061 | L |
| O-O_3 | 0 | 8.887549  | 4.902867  | -1.172302 | L |
| O-O_3 | 0 | 11.968542 | 3.541810  | -2.704086 | L |
| O-O_3 | 0 | 14.479250 | 5.329582  | -0.874500 | L |
| O-O_3 | 0 | 11.298421 | 8.100993  | -0.786767 | L |
| O-O_3 | 0 | 8.972768  | 8.825441  | -1.524567 | L |
| O-O_3 | 0 | 5.567100  | 7.592653  | -4.101758 | L |
| O-O_3 | 0 | 7.772765  | 4.791960  | -4.244681 | L |
| N-N_3 | 0 | 9.292429  | 3.284220  | -2.660222 | L |

|       |   |           |           |           |   |      |    |        |
|-------|---|-----------|-----------|-----------|---|------|----|--------|
| N-N_3 | 0 | 12.247379 | 5.346028  | -0.674484 | L |      |    |        |
| N-N_3 | 0 | 7.133244  | 6.917491  | -2.635488 | L |      |    |        |
| C-C_3 | 0 | 7.373367  | 3.211696  | 0.463424  | L |      |    |        |
| C-C_3 | 0 | 6.763495  | 2.326042  | 1.335997  | L |      |    |        |
| C-C_3 | 0 | 6.910613  | 0.969585  | 1.183343  | L |      |    |        |
| C-C_3 | 0 | 7.552085  | 0.498267  | 0.100455  | L |      |    |        |
| C-C_3 | 0 | 8.120600  | 1.371896  | -0.809041 | L |      |    |        |
| C-C_3 | 0 | 8.068696  | 2.738110  | -0.628499 | L |      |    |        |
| C-C_3 | 0 | 8.770518  | 3.726672  | -1.499544 | L |      |    |        |
| C-C_3 | 0 | 9.910059  | 4.220397  | -3.544681 | L |      |    |        |
| C-C_3 | 0 | 9.120832  | 5.041666  | -4.347806 | L |      |    |        |
| C-C_3 | 0 | 9.702128  | 6.017050  | -5.132249 | L |      |    |        |
| C-C_3 | 0 | 11.060482 | 6.174319  | -5.100416 | L |      |    |        |
| C-C_3 | 0 | 11.865483 | 5.378891  | -4.316699 | L |      |    |        |
| C-C_3 | 0 | 11.288115 | 4.390722  | -3.539931 | L |      |    |        |
| C-C_3 | 0 | 13.295328 | 3.890325  | -2.318399 | L |      |    |        |
| C-C_3 | 0 | 13.368477 | 4.922451  | -1.225874 | L |      |    |        |
| C-C_3 | 0 | 12.258813 | 6.329122  | 0.393784  | L |      |    |        |
| C-C_3 | 0 | 12.480160 | 7.721493  | -0.096695 | L |      |    |        |
| C-C_3 | 0 | 11.213824 | 9.381690  | -1.264024 | L |      |    |        |
| C-C_3 | 0 | 12.260808 | 10.269136 | -1.351881 | L |      |    |        |
| C-C_3 | 0 | 12.047768 | 11.551102 | -1.826936 | L |      |    |        |
| C-C_3 | 0 | 10.807012 | 11.946807 | -2.196537 | L |      |    |        |
| C-C_3 | 0 | 9.736840  | 11.057949 | -2.111466 | L |      |    |        |
| C-C_3 | 0 | 9.932778  | 9.776950  | -1.649181 | L |      |    |        |
| C-C_3 | 0 | 7.624516  | 9.173241  | -1.807550 | L |      |    |        |
| C-C_3 | 0 | 6.822905  | 7.925476  | -1.635027 | L |      |    |        |
| C-C_3 | 0 | 6.489154  | 6.835240  | -3.780787 | L |      |    |        |
| C-C_3 | 0 | 6.850003  | 5.745238  | -4.756443 | L |      |    |        |
| H-H_  | 0 | 7.952738  | 6.470645  | -2.533883 | L |      |    |        |
| H-H_  | 0 | 3.693380  | 2.306357  | -0.927863 | H |      |    |        |
| H-H_  | 0 | 4.785195  | 3.868092  | -2.490531 | H |      |    |        |
| H-H_  | 0 | 4.463183  | 6.289107  | -2.234871 | H |      |    |        |
| H-H_  | 0 | 3.341011  | 7.151036  | -0.247005 | H |      |    |        |
| H-H_  | 0 | 2.349959  | 5.641972  | 1.344091  | H |      |    |        |
| H-H_  | 0 | 1.897692  | -0.089565 | 5.439197  | H |      |    |        |
| H-H_  | 0 | -0.512936 | -0.366318 | 5.392394  | H |      |    |        |
| H-H_  | 0 | -1.926817 | 1.033488  | 4.006710  | H |      |    |        |
| H-H_  | 0 | -2.249873 | -3.365441 | 0.775560  | H |      |    |        |
| H-H_  | 0 | -1.882458 | -5.646904 | 1.593828  | L | H-H_ | 30 | 0.0000 |
| H-H_  | 0 | 0.372777  | -6.365378 | 2.255512  | H |      |    |        |
| H-H_  | 0 | 2.251561  | -4.803966 | 2.099327  | H |      |    |        |
| H-H_  | 0 | -2.760978 | 3.605095  | 1.659915  | H |      |    |        |
| H-H_  | 0 | -0.299873 | 0.312053  | -1.215709 | H |      |    |        |
| H-H_  | 0 | -1.667552 | -1.811817 | -1.048402 | H |      |    |        |
| H-H_  | 0 | 3.723435  | -3.369353 | 0.819165  | H |      |    |        |
| H-H_  | 0 | 3.975343  | -0.913593 | 0.349240  | H |      |    |        |
| H-H_  | 0 | 5.065167  | 1.393851  | 4.659820  | H |      |    |        |
| H-H_  | 0 | -2.892835 | 2.349994  | 2.855665  | H |      |    |        |
| H-H_  | 0 | -2.046259 | 0.519560  | -1.401731 | H |      |    |        |
| H-H_  | 0 | -2.351616 | -1.170315 | 0.444982  | H |      |    |        |
| H-H_  | 0 | 3.484190  | -2.963481 | 2.525148  | H |      |    |        |
| H-H_  | 0 | 5.238466  | -1.583309 | 1.384981  | H |      |    |        |
| H-H_  | 0 | 3.828065  | 0.391090  | 5.389597  | H |      |    |        |
| H-H_  | 0 | 1.825658  | 4.253529  | 2.651426  | H |      |    |        |
| H-H_  | 0 | -0.342579 | 1.537667  | 0.711684  | H |      |    |        |
| H-H_  | 0 | 3.138412  | 0.321081  | 2.076908  | H |      |    |        |
| H-H_  | 0 | -5.962359 | 1.091383  | 3.186770  | H |      |    |        |
| H-H_  | 0 | -7.501059 | 1.688904  | 2.565151  | H |      |    |        |
| H-H_  | 0 | -6.082857 | 2.735464  | 2.529424  | H |      |    |        |
| H-H_  | 0 | -5.248352 | 1.235500  | 0.870461  | H |      |    |        |

|      |   |            |           |           |   |
|------|---|------------|-----------|-----------|---|
| H-H_ | 0 | -5.931788  | 1.331549  | -7.071913 | L |
| H-H_ | 0 | -4.904513  | 2.836085  | -8.548330 | L |
| H-H_ | 0 | -5.112861  | 5.222795  | -8.339792 | L |
| H-H_ | 0 | -6.293126  | 6.079582  | -6.397578 | L |
| H-H_ | 0 | -7.296545  | 4.520533  | -4.917481 | L |
| H-H_ | 0 | -7.819876  | -1.106371 | -0.735286 | L |
| H-H_ | 0 | -10.114648 | -1.366098 | -0.786312 | L |
| H-H_ | 0 | -11.471623 | -0.030979 | -2.106216 | L |
| H-H_ | 0 | -11.907421 | -4.488348 | -5.375533 | L |
| H-H_ | 0 | -11.440776 | -6.671147 | -4.549450 | L |
| H-H_ | 0 | -9.285170  | -7.444250 | -3.876966 | L |
| H-H_ | 0 | -7.402885  | -5.904749 | -4.023288 | L |
| H-H_ | 0 | -12.396598 | 2.538064  | -4.538800 | L |
| H-H_ | 0 | -10.022301 | -0.778994 | -7.334587 | L |
| H-H_ | 0 | -11.275032 | -2.825068 | -7.132433 | L |
| H-H_ | 0 | -5.911771  | -4.437981 | -5.346685 | L |
| H-H_ | 0 | -5.637708  | -2.031850 | -5.722145 | L |
| H-H_ | 0 | -4.548962  | 0.315874  | -1.504992 | L |
| H-H_ | 0 | -12.583538 | 1.360143  | -3.259401 | L |
| H-H_ | 0 | -11.618568 | -0.584543 | -7.503362 | L |
| H-H_ | 0 | -11.919919 | -2.237377 | -5.727610 | L |
| H-H_ | 0 | -6.165503  | -3.993053 | -3.682436 | L |
| H-H_ | 0 | -4.380811  | -2.664847 | -4.784613 | L |
| H-H_ | 0 | -5.762589  | -0.649686 | -0.693341 | L |
| H-H_ | 0 | -7.311726  | 2.896429  | -3.302585 | L |
| H-H_ | 0 | -10.046148 | 0.491134  | -5.489957 | L |
| H-H_ | 0 | -6.594497  | -0.963726 | -3.904212 | L |
| H-H_ | 0 | -8.535005  | -3.719884 | 8.238058  | L |
| H-H_ | 0 | -9.562577  | -5.224427 | 9.714241  | L |
| H-H_ | 0 | -9.356227  | -7.611096 | 9.504524  | L |
| H-H_ | 0 | -8.182071  | -8.468166 | 7.559640  | L |
| H-H_ | 0 | -7.208029  | -6.927511 | 6.056945  | L |
| H-H_ | 0 | -6.647583  | -1.289595 | 1.896094  | L |
| H-H_ | 0 | -4.352311  | -1.023591 | 1.952452  | L |
| H-H_ | 0 | -2.995204  | -2.356978 | 3.271596  | L |
| H-H_ | 0 | -2.558924  | 2.099332  | 6.539031  | L |
| H-H_ | 0 | -3.024796  | 4.280612  | 5.708528  | L |
| H-H_ | 0 | -5.179203  | 5.052829  | 5.033357  | L |
| H-H_ | 0 | -7.052971  | 3.492563  | 5.158506  | L |
| H-H_ | 0 | -2.069457  | -4.926447 | 5.703538  | L |
| H-H_ | 0 | -4.444529  | -1.609376 | 8.500684  | L |
| H-H_ | 0 | -3.191520  | 0.436931  | 8.298161  | L |
| H-H_ | 0 | -8.557840  | 2.051862  | 6.512744  | L |
| H-H_ | 0 | -8.836203  | -0.356511 | 6.889476  | L |
| H-H_ | 0 | -9.915906  | -2.710947 | 2.654416  | L |
| H-H_ | 0 | -1.883577  | -3.747787 | 4.424905  | L |
| H-H_ | 0 | -2.848141  | -1.803664 | 8.669179  | L |
| H-H_ | 0 | -2.547605  | -0.150707 | 6.893527  | L |
| H-H_ | 0 | -8.303119  | 1.604591  | 4.850063  | L |
| H-H_ | 0 | -10.085286 | 0.288270  | 5.936654  | L |
| H-H_ | 0 | -8.701471  | -1.747256 | 1.855295  | L |
| H-H_ | 0 | -6.686634  | -5.569647 | 4.564839  | L |
| H-H_ | 0 | -4.420794  | -2.878730 | 6.655266  | L |
| H-H_ | 0 | -7.871743  | -1.423541 | 5.069961  | L |
| H-H_ | 0 | -2.954192  | -7.798275 | -1.229790 | L |
| H-H_ | 0 | -4.332959  | -8.244769 | 0.613744  | L |
| H-H_ | 0 | -5.490222  | -6.521833 | 1.830506  | L |
| H-H_ | 0 | -5.352388  | -4.257863 | 0.966742  | L |
| H-H_ | 0 | -3.968286  | -3.854840 | -0.915595 | L |
| H-H_ | 0 | -1.274994  | -4.733103 | -7.347922 | L |
| H-H_ | 0 | 0.757434   | -3.684225 | -7.023449 | L |

|      |   |           |            |           |   |
|------|---|-----------|------------|-----------|---|
| H-H_ | 0 | 1.396515  | -2.860300  | -4.956783 | L |
| H-H_ | 0 | 4.772902  | -7.253630  | -4.756628 | L |
| H-H_ | 0 | 5.413769  | -8.403945  | -6.739386 | L |
| H-H_ | 0 | 3.936531  | -9.671872  | -8.120045 | L |
| H-H_ | 0 | 1.588097  | -9.808260  | -7.487117 | L |
| H-H_ | 0 | 1.241220  | -2.107639  | -1.395552 | L |
| H-H_ | 0 | 1.589920  | -7.056898  | -1.442888 | L |
| H-H_ | 0 | 3.684279  | -7.546046  | -2.524146 | L |
| H-H_ | 0 | -0.181431 | -10.445739 | -5.877043 | L |
| H-H_ | 0 | -1.639070 | -9.303044  | -4.267952 | L |
| H-H_ | 0 | -4.588520 | -6.031349  | -6.551412 | L |
| H-H_ | 0 | 1.774347  | -2.048933  | -3.042517 | L |
| H-H_ | 0 | 2.825399  | -6.169068  | -0.897741 | L |
| H-H_ | 0 | 3.634769  | -6.038423  | -3.201517 | L |
| H-H_ | 0 | -0.522899 | -9.087384  | -6.914654 | L |
| H-H_ | 0 | -2.494530 | -9.843185  | -5.631745 | L |
| H-H_ | 0 | -3.222770 | -5.521611  | -7.507400 | L |
| H-H_ | 0 | -3.373429 | -3.949435  | -3.120954 | L |
| H-H_ | 0 | 0.576006  | -5.208625  | -2.195697 | L |
| H-H_ | 0 | -1.766137 | -7.089782  | -4.947837 | L |
| H-H_ | 0 | -7.331616 | 5.350628   | 3.325829  | L |
| H-H_ | 0 | -8.738528 | 4.906786   | 5.161152  | L |
| H-H_ | 0 | -9.868151 | 6.625835   | 6.386132  | L |
| H-H_ | 0 | -9.727610 | 8.892305   | 5.527640  | L |
| H-H_ | 0 | -8.376393 | 9.302918   | 3.633993  | L |
| H-H_ | 0 | -5.643949 | 8.416888   | -2.785556 | L |
| H-H_ | 0 | -3.611718 | 9.465994   | -2.461050 | L |
| H-H_ | 0 | -2.972805 | 10.290417  | -0.393056 | L |
| H-H_ | 0 | 0.389658  | 5.920961   | -0.207320 | L |
| H-H_ | 0 | 1.043522  | 4.749999   | -2.179291 | L |
| H-H_ | 0 | -0.432444 | 3.477288   | -3.556713 | L |
| H-H_ | 0 | -2.780813 | 3.339361   | -2.922731 | L |
| H-H_ | 0 | -3.145346 | 11.024648  | 3.185188  | L |
| H-H_ | 0 | -2.778860 | 6.092556   | 3.119148  | L |
| H-H_ | 0 | -0.678843 | 5.609969   | 2.036217  | L |
| H-H_ | 0 | -4.550678 | 2.708382   | -1.321795 | L |
| H-H_ | 0 | -5.998782 | 3.857198   | 0.293930  | L |
| H-H_ | 0 | -8.958880 | 7.122969   | -1.986711 | L |
| H-H_ | 0 | -2.595630 | 11.110656  | 1.526879  | L |
| H-H_ | 0 | -1.542790 | 6.980883   | 3.663793  | L |
| H-H_ | 0 | -0.738197 | 7.113997   | 1.359700  | L |
| H-H_ | 0 | -4.893565 | 4.064179   | -2.351874 | L |
| H-H_ | 0 | -6.868638 | 3.304839   | -1.047540 | L |
| H-H_ | 0 | -7.591584 | 7.627670   | -2.945688 | L |
| H-H_ | 0 | -7.495468 | 9.575964   | 1.765598  | L |
| H-H_ | 0 | -3.791020 | 7.939964   | 2.356566  | L |
| H-H_ | 0 | -6.134337 | 6.060856   | -0.386645 | L |
| H-H_ | 0 | 6.688309  | -6.722831  | 4.904219  | L |
| H-H_ | 0 | 5.309566  | -7.169344  | 6.747730  | L |
| H-H_ | 0 | 4.152642  | -5.447548  | 7.964382  | L |
| H-H_ | 0 | 4.294741  | -3.179973  | 7.106067  | L |
| H-H_ | 0 | 5.682704  | -2.778092  | 5.224577  | L |
| H-H_ | 0 | 8.366663  | -3.656391  | -1.213070 | L |
| H-H_ | 0 | 10.400115 | -2.606705  | -0.888974 | L |
| H-H_ | 0 | 11.039142 | -1.782501  | 1.179027  | L |
| H-H_ | 0 | 14.416404 | -6.177525  | 1.377819  | L |
| H-H_ | 0 | 15.057309 | -7.328117  | -0.604607 | L |
| H-H_ | 0 | 13.580084 | -8.596081  | -1.985197 | L |
| H-H_ | 0 | 11.231654 | -8.732480  | -1.352255 | L |
| H-H_ | 0 | 10.867442 | -1.049985  | 4.757653  | L |
| H-H_ | 0 | 11.233662 | -5.981475  | 4.691758  | L |

|      |   |           |           |           |   |
|------|---|-----------|-----------|-----------|---|
| H-H_ | 0 | 13.328592 | -6.470031 | 3.610377  | L |
| H-H_ | 0 | 9.462120  | -9.370010 | 0.257796  | L |
| H-H_ | 0 | 8.004401  | -8.227385 | 1.866923  | L |
| H-H_ | 0 | 5.058610  | -4.968178 | -0.399572 | L |
| H-H_ | 0 | 11.417033 | -0.964018 | 3.099374  | L |
| H-H_ | 0 | 12.470197 | -5.093282 | 5.236232  | L |
| H-H_ | 0 | 13.277415 | -4.962484 | 2.932482  | L |
| H-H_ | 0 | 9.120623  | -8.011619 | -0.779760 | L |
| H-H_ | 0 | 7.149000  | -8.767352 | 0.502976  | L |
| H-H_ | 0 | 6.410819  | -4.443040 | -1.374088 | L |
| H-H_ | 0 | 6.269999  | -2.874223 | 3.013438  | L |
| H-H_ | 0 | 10.221980 | -4.134653 | 3.928504  | L |
| H-H_ | 0 | 7.877420  | -6.014016 | 1.187006  | L |
| H-H_ | 0 | 7.290166  | 4.177215  | 0.631646  | L |
| H-H_ | 0 | 6.270206  | 2.672036  | 2.112919  | L |
| H-H_ | 0 | 6.529004  | 0.289781  | 1.918072  | L |
| H-H_ | 0 | 7.651609  | -0.569245 | -0.040909 | L |
| H-H_ | 0 | 8.620463  | 0.969198  | -1.547328 | L |
| H-H_ | 0 | 9.179460  | 6.617366  | -5.702036 | L |
| H-H_ | 0 | 11.474409 | 6.876145  | -5.651634 | L |
| H-H_ | 0 | 12.831152 | 5.540068  | -4.333115 | L |
| H-H_ | 0 | 13.267027 | 9.997172  | -1.064421 | L |
| H-H_ | 0 | 12.800362 | 12.179987 | -1.890427 | L |
| H-H_ | 0 | 10.644913 | 12.953077 | -2.562770 | L |
| H-H_ | 0 | 8.762684  | 11.413664 | -2.416542 | L |
| H-H_ | 0 | 13.756232 | 2.970732  | -1.900948 | L |
| H-H_ | 0 | 11.381816 | 6.287760  | 0.894690  | L |
| H-H_ | 0 | 12.634636 | 8.333832  | 0.692660  | L |
| H-H_ | 0 | 7.268174  | 9.949090  | -1.093435 | L |
| H-H_ | 0 | 6.986262  | 7.540142  | -0.715865 | L |
| H-H_ | 0 | 5.909896  | 5.185960  | -4.948616 | L |
| H-H_ | 0 | 13.943167 | 4.148662  | -3.180393 | L |
| H-H_ | 0 | 12.978062 | 6.093258  | 1.063550  | L |
| H-H_ | 0 | 13.279567 | 7.746170  | -0.712161 | L |
| H-H_ | 0 | 7.526914  | 9.500566  | -2.757914 | L |
| H-H_ | 0 | 5.744608  | 8.195488  | -1.671312 | L |
| H-H_ | 0 | 7.124715  | 6.148548  | -5.750894 | L |
| H-H_ | 0 | 9.137700  | 2.327876  | -3.041097 | L |
| H-H_ | 0 | 11.405769 | 5.017451  | -0.949778 | L |

e) Gaussian input files for Sample crystallized from toluene 1b)

```
%chk=koron_219_toluen.chk  
%mem=4GB  
%nproc=4  
# NMR oniom(b3lyp/6-311++g(d,p):uff)
```

Sample crystallized from toluene 1b)

```
0 1 0 1 0 1  
O-O_3      0   -0.579447   -1.143018    0.444708 H  
O-O_3      0    0.865778   -2.266966    2.908392 H  
O-O_3      0    2.334935   -5.190454    1.405416 H  
O-O_3      0    3.514280   -2.172916   -1.138766 H  
O-O_3      0    4.084807    0.316276   -1.602202 H  
O-O_3      0    3.185200    4.507643   -0.305794 H  
O-O_3      0    1.145734    2.175867    1.563702 H  
N-N_3      0   -0.325139    0.054889    2.352154 H  
N-N_3      0    1.351213   -3.383864    0.446556 H  
N-N_3      0    2.320006    2.500990   -0.912796 H  
C-C_3      0   -3.327946   -0.606121    0.388637 H  
C-C_3      0   -4.715374   -0.508548    0.440049 H  
C-C_3      0   -5.341348   -0.274939    1.653557 H  
C-C_3      0   -4.592441   -0.128179    2.813632 H  
C-C_3      0   -3.204291   -0.207571    2.762211 H  
C-C_3      0   -2.568261   -0.445330    1.550007 H  
C-C_3      0   -1.075344   -0.542763    1.411651 H  
C-C_3      0    1.103994   -0.039810    2.288308 H  
C-C_3      0    1.871949    1.061030    1.897173 H  
C-C_3      0    3.255219    0.953602    1.806356 H  
C-C_3      0    3.852438   -0.258128    2.111874 H  
C-C_3      0    3.110459   -1.372350    2.481474 H  
C-C_3      0    1.729617   -1.251645    2.580346 H  
C-C_3      0    1.364926   -3.606547    2.875228 H  
C-C_3      0    1.736052   -4.117186    1.505731 H  
C-C_3      0    1.725370   -3.749893   -0.893655 H  
C-C_3      0    3.205624   -3.578021   -1.147016 H  
C-C_3      0    4.855558   -1.848563   -1.110716 H  
C-C_3      0    5.880299   -2.755363   -0.881724 H  
C-C_3      0    7.213135   -2.323071   -0.867641 H  
C-C_3      0    7.502228   -1.001543   -1.089300 H  
C-C_3      0    6.486183   -0.082660   -1.341208 H  
C-C_3      0    5.157151   -0.499323   -1.349575 H  
C-C_3      0    4.387124    1.680065   -1.930982 H  
C-C_3      0    3.069359    2.394267   -2.149228 H  
C-C_3      0    2.515204    3.501844   -0.065199 H  
C-C_3      0    1.856150    3.391796    1.302226 H  
O-O_3      0    1.156400   -0.155791   -1.425248 H  
C-C_3      0   -1.979478    3.559640    0.189525 H  
C-C_3      0   -1.467432    4.851000    0.163999 H  
C-C_3      0   -0.620253    5.244206   -0.865219 H  
C-C_3      0   -0.285224    4.344091   -1.870871 H  
C-C_3      0   -0.795401    3.052855   -1.845665 H  
C-C_3      0   -1.642580    2.659649   -0.816447 H  
C-C_3      0   -2.849343    3.132553    1.318976 H  
O-O_3      0    9.032351   -5.403901   -0.895458 L  
O-O_3      0    9.423042   -4.157993   -3.673362 L  
O-O_3      0   10.918366   -1.037638   -2.677632 L  
O-O_3      0   13.251108   -3.821903   -0.734645 L  
O-O_3      0   14.257822   -6.206192   -0.541095 L
```



|       |   |           |            |           |   |
|-------|---|-----------|------------|-----------|---|
| O-O_3 | 0 | 13.526291 | -10.505915 | -1.558331 | L |
| O-O_3 | 0 | 10.701073 | -8.497392  | -2.595195 | L |
| N-N_3 | 0 | 8.792417  | -6.600820  | -2.805269 | L |
| N-N_3 | 0 | 10.548498 | -2.934052  | -1.487137 | L |
| N-N_3 | 0 | 12.660614 | -8.614243  | -0.655088 | L |
| C-C_3 | 0 | 6.550675  | -6.288330  | 0.055798  | L |
| C-C_3 | 0 | 5.249245  | -6.564396  | 0.464650  | L |
| C-C_3 | 0 | 4.292286  | -6.903253  | -0.477903 | L |
| C-C_3 | 0 | 4.627068  | -6.978024  | -1.823452 | L |
| C-C_3 | 0 | 5.931516  | -6.719764  | -2.232873 | L |
| C-C_3 | 0 | 6.896895  | -6.375562  | -1.294883 | L |
| C-C_3 | 0 | 8.325758  | -6.084131  | -1.656559 | L |
| C-C_3 | 0 | 10.137333 | -6.321937  | -3.216172 | L |
| C-C_3 | 0 | 11.126190 | -7.306011  | -3.125848 | L |
| C-C_3 | 0 | 12.435532 | -7.019681  | -3.495780 | L |
| C-C_3 | 0 | 12.736907 | -5.748353  | -3.955059 | L |
| C-C_3 | 0 | 11.777706 | -4.747044  | -4.033534 | L |
| C-C_3 | 0 | 10.469687 | -5.046369  | -3.672203 | L |
| C-C_3 | 0 | 9.728462  | -2.764933  | -3.777806 | L |
| C-C_3 | 0 | 10.463252 | -2.180828  | -2.597589 | L |
| C-C_3 | 0 | 11.294997 | -2.493611  | -0.338824 | L |
| C-C_3 | 0 | 12.784720 | -2.468156  | -0.593683 | L |
| C-C_3 | 0 | 14.537318 | -3.971586  | -1.212333 | L |
| C-C_3 | 0 | 15.302842 | -2.945891  | -1.747826 | L |
| C-C_3 | 0 | 16.599657 | -3.203497  | -2.211978 | L |
| C-C_3 | 0 | 17.113175 | -4.471770  | -2.127557 | L |
| C-C_3 | 0 | 16.364894 | -5.507889  | -1.573778 | L |
| C-C_3 | 0 | 15.071753 | -5.265289  | -1.116560 | L |
| C-C_3 | 0 | 14.824592 | -7.512343  | -0.361027 | L |
| C-C_3 | 0 | 13.756828 | -8.385015  | 0.265507  | L |
| C-C_3 | 0 | 12.691056 | -9.600202  | -1.541269 | L |
| C-C_3 | 0 | 11.608014 | -9.605786  | -2.610566 | L |
| O-O_3 | 0 | 9.317399  | 8.837083   | 0.536379  | L |
| O-O_3 | 0 | 7.872174  | 9.961031   | -1.927305 | L |
| O-O_3 | 0 | 6.403018  | 12.884519  | -0.424329 | L |
| O-O_3 | 0 | 5.223672  | 9.866981   | 2.119853  | L |
| O-O_3 | 0 | 4.653145  | 7.377789   | 2.583288  | L |
| O-O_3 | 0 | 5.552752  | 3.186422   | 1.286881  | L |
| O-O_3 | 0 | 7.592218  | 5.518198   | -0.582616 | L |
| N-N_3 | 0 | 9.063091  | 7.639176   | -1.371067 | L |
| N-N_3 | 0 | 7.386739  | 11.077929  | 0.534531  | L |
| N-N_3 | 0 | 6.417946  | 5.193075   | 1.893883  | L |
| C-C_3 | 0 | 12.065898 | 8.300186   | 0.592449  | L |
| C-C_3 | 0 | 13.453326 | 8.202613   | 0.541037  | L |
| C-C_3 | 0 | 14.079300 | 7.969004   | -0.672470 | L |
| C-C_3 | 0 | 13.330393 | 7.822244   | -1.832545 | L |
| C-C_3 | 0 | 11.942243 | 7.901636   | -1.781124 | L |
| C-C_3 | 0 | 11.306213 | 8.139395   | -0.568921 | L |
| C-C_3 | 0 | 9.813297  | 8.236828   | -0.430564 | L |
| C-C_3 | 0 | 7.633959  | 7.733875   | -1.307221 | L |
| C-C_3 | 0 | 6.866004  | 6.633035   | -0.916086 | L |
| C-C_3 | 0 | 5.482734  | 6.740463   | -0.825269 | L |
| C-C_3 | 0 | 4.885515  | 7.952193   | -1.130787 | L |
| C-C_3 | 0 | 5.627493  | 9.066415   | -1.500387 | L |
| C-C_3 | 0 | 7.008335  | 8.945710   | -1.599259 | L |
| C-C_3 | 0 | 7.373027  | 11.300612  | -1.894141 | L |
| C-C_3 | 0 | 7.001900  | 11.811251  | -0.524644 | L |
| C-C_3 | 0 | 7.012582  | 11.443958  | 1.874742  | L |
| C-C_3 | 0 | 5.532329  | 11.272086  | 2.128103  | L |
| C-C_3 | 0 | 3.882394  | 9.542628   | 2.091803  | L |
| C-C_3 | 0 | 2.857653  | 10.449428  | 1.862811  | L |

|       |   |            |            |           |   |
|-------|---|------------|------------|-----------|---|
| C-C_3 | 0 | 1.524817   | 10.017136  | 1.848727  | L |
| C-C_3 | 0 | 1.235724   | 8.695608   | 2.070387  | L |
| C-C_3 | 0 | 2.251770   | 7.776725   | 2.322294  | L |
| C-C_3 | 0 | 3.580802   | 8.193388   | 2.330662  | L |
| C-C_3 | 0 | 4.350828   | 6.014000   | 2.912068  | L |
| C-C_3 | 0 | 5.668594   | 5.299798   | 3.130315  | L |
| C-C_3 | 0 | 6.222748   | 4.192221   | 1.046286  | L |
| C-C_3 | 0 | 6.881802   | 4.302269   | -0.321139 | L |
| O-O_3 | 0 | -9.460573  | -6.632377  | 2.269634  | L |
| O-O_3 | 0 | -9.069882  | -5.386469  | -0.508270 | L |
| O-O_3 | 0 | -7.574558  | -2.266114  | 0.487460  | L |
| O-O_3 | 0 | -5.241816  | -5.050379  | 2.430447  | L |
| O-O_3 | 0 | -4.235102  | -7.434668  | 2.623997  | L |
| O-O_3 | 0 | -4.966633  | -11.734391 | 1.606761  | L |
| O-O_3 | 0 | -7.791851  | -9.725868  | 0.569897  | L |
| N-N_3 | 0 | -9.700507  | -7.829296  | 0.359823  | L |
| N-N_3 | 0 | -7.944426  | -4.162528  | 1.677955  | L |
| N-N_3 | 0 | -5.832311  | -9.842719  | 2.510004  | L |
| C-C_3 | 0 | -11.942249 | -7.516807  | 3.220890  | L |
| C-C_3 | 0 | -13.243680 | -7.792872  | 3.629742  | L |
| C-C_3 | 0 | -14.200638 | -8.131729  | 2.687189  | L |
| C-C_3 | 0 | -13.865856 | -8.206500  | 1.341640  | L |
| C-C_3 | 0 | -12.561409 | -7.948240  | 0.932219  | L |
| C-C_3 | 0 | -11.596029 | -7.604038  | 1.870209  | L |
| C-C_3 | 0 | -10.167166 | -7.312608  | 1.508533  | L |
| C-C_3 | 0 | -8.355591  | -7.550413  | -0.051080 | L |
| C-C_3 | 0 | -7.366734  | -8.534487  | 0.039244  | L |
| C-C_3 | 0 | -6.057392  | -8.248158  | -0.330688 | L |
| C-C_3 | 0 | -5.756017  | -6.976829  | -0.789967 | L |
| C-C_3 | 0 | -6.715219  | -5.975520  | -0.868442 | L |
| C-C_3 | 0 | -8.023237  | -6.274845  | -0.507111 | L |
| C-C_3 | 0 | -8.764462  | -3.993409  | -0.612714 | L |
| C-C_3 | 0 | -8.029672  | -3.409304  | 0.567503  | L |
| C-C_3 | 0 | -7.197927  | -3.722087  | 2.826268  | L |
| C-C_3 | 0 | -5.708204  | -3.696632  | 2.571409  | L |
| C-C_3 | 0 | -3.955606  | -5.200062  | 1.952760  | L |
| C-C_3 | 0 | -3.190082  | -4.174368  | 1.417266  | L |
| C-C_3 | 0 | -1.893267  | -4.431973  | 0.953114  | L |
| C-C_3 | 0 | -1.379749  | -5.700246  | 1.037535  | L |
| C-C_3 | 0 | -2.128030  | -6.736366  | 1.591314  | L |
| C-C_3 | 0 | -3.421171  | -6.493765  | 2.048532  | L |
| C-C_3 | 0 | -3.668332  | -8.740819  | 2.804066  | L |
| C-C_3 | 0 | -4.736097  | -9.613491  | 3.430599  | L |
| C-C_3 | 0 | -5.801868  | -10.828678 | 1.623823  | L |
| C-C_3 | 0 | -6.884910  | -10.834262 | 0.554526  | L |
| O-O_3 | 0 | -11.042756 | 6.024664   | -2.062092 | L |
| O-O_3 | 0 | -10.652065 | 7.270572   | -4.839996 | L |
| O-O_3 | 0 | -9.156741  | 10.390927  | -3.844266 | L |
| O-O_3 | 0 | -6.823999  | 7.606662   | -1.901278 | L |
| O-O_3 | 0 | -5.817284  | 5.222373   | -1.707729 | L |
| O-O_3 | 0 | -6.548816  | 0.922650   | -2.724964 | L |
| O-O_3 | 0 | -9.374034  | 2.931173   | -3.761829 | L |
| N-N_3 | 0 | -11.282690 | 4.827745   | -3.971903 | L |
| N-N_3 | 0 | -9.526608  | 8.494513   | -2.653771 | L |
| N-N_3 | 0 | -7.414493  | 2.814322   | -1.821721 | L |
| C-C_3 | 0 | -13.524431 | 5.140235   | -1.110835 | L |
| C-C_3 | 0 | -14.825862 | 4.864169   | -0.701984 | L |
| C-C_3 | 0 | -15.782821 | 4.525313   | -1.644536 | L |
| C-C_3 | 0 | -15.448039 | 4.450541   | -2.990086 | L |
| C-C_3 | 0 | -14.143591 | 4.708801   | -3.399507 | L |
| C-C_3 | 0 | -13.178212 | 5.053003   | -2.461517 | L |

|       |   |            |           |           |   |
|-------|---|------------|-----------|-----------|---|
| C-C_3 | 0 | -11.749349 | 5.344434  | -2.823193 | L |
| C-C_3 | 0 | -9.937774  | 5.106628  | -4.382806 | L |
| C-C_3 | 0 | -8.948916  | 4.122554  | -4.292481 | L |
| C-C_3 | 0 | -7.639574  | 4.408884  | -4.662413 | L |
| C-C_3 | 0 | -7.338200  | 5.680212  | -5.121692 | L |
| C-C_3 | 0 | -8.297401  | 6.681521  | -5.200168 | L |
| C-C_3 | 0 | -9.605420  | 6.382196  | -4.838837 | L |
| C-C_3 | 0 | -10.346645 | 8.663632  | -4.944439 | L |
| C-C_3 | 0 | -9.611855  | 9.247737  | -3.764222 | L |
| C-C_3 | 0 | -8.780110  | 8.934954  | -1.505458 | L |
| C-C_3 | 0 | -7.290387  | 8.960409  | -1.760317 | L |
| C-C_3 | 0 | -5.537788  | 7.456979  | -2.378966 | L |
| C-C_3 | 0 | -4.772265  | 8.482674  | -2.914460 | L |
| C-C_3 | 0 | -3.475450  | 8.225068  | -3.378612 | L |
| C-C_3 | 0 | -2.961932  | 6.956795  | -3.294191 | L |
| C-C_3 | 0 | -3.710213  | 5.920676  | -2.740412 | L |
| C-C_3 | 0 | -5.003354  | 6.163276  | -2.283194 | L |
| C-C_3 | 0 | -5.250514  | 3.916222  | -1.527660 | L |
| C-C_3 | 0 | -6.318279  | 3.043550  | -0.901126 | L |
| C-C_3 | 0 | -7.384051  | 1.828363  | -2.707903 | L |
| C-C_3 | 0 | -8.467093  | 1.822779  | -3.777200 | L |
| O-O_3 | 0 | -0.538936  | -2.600292 | -5.645239 | L |
| O-O_3 | 0 | -0.929627  | -3.846199 | -2.867335 | L |
| O-O_3 | 0 | -2.424950  | -6.966554 | -3.863065 | L |
| O-O_3 | 0 | -4.757693  | -4.182289 | -5.806053 | L |
| O-O_3 | 0 | -5.764393  | -1.797967 | -5.999509 | L |
| O-O_3 | 0 | -5.032862  | 2.501756  | -4.982273 | L |
| O-O_3 | 0 | -2.207644  | 0.493233  | -3.945409 | L |
| N-N_3 | 0 | -0.299001  | -1.403372 | -3.735428 | L |
| N-N_3 | 0 | -2.055069  | -5.070107 | -5.053467 | L |
| N-N_3 | 0 | -4.167198  | 0.610051  | -5.885609 | L |
| C-C_3 | 0 | 1.942740   | -1.715862 | -6.596496 | L |
| C-C_3 | 0 | 3.244185   | -1.439763 | -7.005254 | L |
| C-C_3 | 0 | 4.201129   | -1.100940 | -6.062795 | L |
| C-C_3 | 0 | 3.866348   | -1.026168 | -4.717245 | L |
| C-C_3 | 0 | 2.561900   | -1.284429 | -4.307824 | L |
| C-C_3 | 0 | 1.596520   | -1.628631 | -5.245814 | L |
| C-C_3 | 0 | 0.167657   | -1.920061 | -4.884138 | L |
| C-C_3 | 0 | -1.643918  | -1.682255 | -3.324525 | L |
| C-C_3 | 0 | -2.632775  | -0.698181 | -3.414849 | L |
| C-C_3 | 0 | -3.942103  | -0.984477 | -3.044825 | L |
| C-C_3 | 0 | -4.243491  | -2.255840 | -2.585639 | L |
| C-C_3 | 0 | -3.284290  | -3.257148 | -2.507163 | L |
| C-C_3 | 0 | -1.976258  | -2.957790 | -2.868401 | L |
| C-C_3 | 0 | -1.235046  | -5.239259 | -2.762892 | L |
| C-C_3 | 0 | -1.969837  | -5.823364 | -3.943109 | L |
| C-C_3 | 0 | -2.801582  | -5.510581 | -6.201873 | L |
| C-C_3 | 0 | -4.291305  | -5.536036 | -5.947014 | L |
| C-C_3 | 0 | -6.043903  | -4.032607 | -5.328365 | L |
| C-C_3 | 0 | -6.809427  | -5.058301 | -4.792871 | L |
| C-C_3 | 0 | -8.106241  | -4.800695 | -4.328719 | L |
| C-C_3 | 0 | -8.619746  | -3.532388 | -4.413047 | L |
| C-C_3 | 0 | -7.871479  | -2.496303 | -4.966919 | L |
| C-C_3 | 0 | -6.578336  | -2.738776 | -5.424076 | L |
| C-C_3 | 0 | -6.331177  | -0.491849 | -6.179671 | L |
| C-C_3 | 0 | -5.263412  | 0.380822  | -6.806205 | L |
| C-C_3 | 0 | -4.197627  | 1.596043  | -4.999335 | L |
| C-C_3 | 0 | -3.114599  | 1.601594  | -3.930131 | L |
| O-O_3 | 0 | -1.080982  | 1.155451  | 5.040730  | H |
| O-O_3 | 0 | 1.287784   | 0.440924  | 6.208271  | L |
| O-O_3 | 0 | 0.897093   | -0.804983 | 8.986175  | L |

|       |   |           |           |           |   |
|-------|---|-----------|-----------|-----------|---|
| O-O_3 | 0 | -0.598231 | -3.925338 | 7.990444  | L |
| O-O_3 | 0 | -2.930973 | -1.141073 | 6.047457  | L |
| O-O_3 | 0 | -3.937687 | 1.243216  | 5.853908  | L |
| O-O_3 | 0 | -3.206156 | 5.542939  | 6.871143  | L |
| O-O_3 | 0 | -0.380938 | 3.534416  | 7.908008  | L |
| N-N_3 | 0 | 1.527718  | 1.637844  | 8.118082  | L |
| N-N_3 | 0 | -0.228363 | -2.028925 | 6.799950  | L |
| N-N_3 | 0 | -2.340478 | 3.651267  | 5.967900  | L |
| C-C_3 | 0 | 3.769460  | 1.325354  | 5.257014  | L |
| C-C_3 | 0 | 5.070891  | 1.601419  | 4.848163  | L |
| C-C_3 | 0 | 6.027849  | 1.940276  | 5.790715  | L |
| C-C_3 | 0 | 5.693067  | 2.015048  | 7.136265  | L |
| C-C_3 | 0 | 4.388619  | 1.756787  | 7.545686  | L |
| C-C_3 | 0 | 3.423240  | 1.412585  | 6.607696  | L |
| C-C_3 | 0 | 1.994377  | 1.121155  | 6.969372  | L |
| C-C_3 | 0 | 0.182802  | 1.358961  | 8.528984  | L |
| C-C_3 | 0 | -0.806055 | 2.343035  | 8.438660  | L |
| C-C_3 | 0 | -2.115397 | 2.056705  | 8.808592  | L |
| C-C_3 | 0 | -2.416772 | 0.785376  | 9.267871  | L |
| C-C_3 | 0 | -1.457571 | -0.215932 | 9.346347  | L |
| C-C_3 | 0 | -0.149552 | 0.083393  | 8.985016  | L |
| C-C_3 | 0 | 0.591673  | -2.198043 | 9.090618  | L |
| C-C_3 | 0 | -0.143117 | -2.782148 | 7.910401  | L |
| C-C_3 | 0 | -0.974862 | -2.469365 | 5.651636  | L |
| C-C_3 | 0 | -2.464585 | -2.494820 | 5.906496  | L |
| C-C_3 | 0 | -4.217183 | -0.991391 | 6.525145  | L |
| C-C_3 | 0 | -4.982707 | -2.017085 | 7.060638  | L |
| C-C_3 | 0 | -6.279522 | -1.759479 | 7.524791  | L |
| C-C_3 | 0 | -6.793040 | -0.491206 | 7.440369  | L |
| C-C_3 | 0 | -6.044759 | 0.544913  | 6.886591  | L |
| C-C_3 | 0 | -4.751618 | 0.302313  | 6.429373  | L |
| C-C_3 | 0 | -4.504457 | 2.549367  | 5.673839  | L |
| C-C_3 | 0 | -3.436693 | 3.422038  | 5.047305  | L |
| C-C_3 | 0 | -2.370921 | 4.637226  | 6.854082  | L |
| C-C_3 | 0 | -1.287879 | 4.642810  | 7.923379  | L |
| H-H_  | 0 | -0.684483 | 5.560035  | 7.759556  | L |
| H-H_  | 0 | -0.761562 | 0.490125  | 3.158961  | H |
| H-H_  | 0 | 0.775607  | -2.554346 | 0.580513  | H |
| H-H_  | 0 | 1.717129  | 1.705996  | -0.699658 | H |
| H-H_  | 0 | -2.801912 | -0.811522 | -0.534701 | H |
| H-H_  | 0 | -5.307240 | -0.613425 | -0.464052 | H |
| H-H_  | 0 | -6.424042 | -0.192711 | 1.702711  | H |
| H-H_  | 0 | -5.102203 | 0.043066  | 3.754137  | H |
| H-H_  | 0 | -2.631558 | -0.081140 | 3.673230  | H |
| H-H_  | 0 | 3.819526  | 1.768102  | 1.414097  | H |
| H-H_  | 0 | 4.930651  | -0.353267 | 2.017491  | H |
| H-H_  | 0 | 3.613854  | -2.310834 | 2.680959  | H |
| H-H_  | 0 | 0.546098  | -4.220619 | 3.260681  | H |
| H-H_  | 0 | 2.220407  | -3.737451 | 3.546548  | H |
| H-H_  | 0 | 1.156216  | -3.122409 | -1.583062 | H |
| H-H_  | 0 | 1.470076  | -4.800379 | -1.079069 | H |
| H-H_  | 0 | 3.753344  | -4.092150 | -0.356527 | H |
| H-H_  | 0 | 3.487970  | -4.003016 | -2.120256 | H |
| H-H_  | 0 | 5.661349  | -3.799642 | -0.720005 | H |
| H-H_  | 0 | 7.997588  | -3.041433 | -0.662700 | H |
| H-H_  | 0 | 8.530202  | -0.649881 | -1.071043 | H |
| H-H_  | 0 | 6.741676  | 0.953164  | -1.528714 | H |
| H-H_  | 0 | 5.001797  | 1.712449  | -2.841607 | H |
| H-H_  | 0 | 4.937922  | 2.142093  | -1.107954 | H |
| H-H_  | 0 | 3.269631  | 3.400208  | -2.530048 | H |
| H-H_  | 0 | 2.463278  | 1.845586  | -2.875235 | H |

|      |   |           |            |           |   |
|------|---|-----------|------------|-----------|---|
| H-H_ | 0 | 2.618372  | 3.552464   | 2.071231  | H |
| H-H_ | 0 | 1.107119  | 4.182756   | 1.380253  | H |
| H-H_ | 0 | 0.536292  | -0.508456  | -0.757299 | H |
| H-H_ | 0 | 2.016545  | -0.574682  | -1.243694 | H |
| H-H_ | 0 | -1.739559 | 5.555550   | 0.947755  | H |
| H-H_ | 0 | -0.217587 | 6.254409   | -0.886212 | H |
| H-H_ | 0 | 0.382363  | 4.652795   | -2.671356 | H |
| H-H_ | 0 | -0.509187 | 2.338328   | -2.612762 | H |
| H-H_ | 0 | -2.039949 | 1.648602   | -0.793978 | H |
| H-H_ | 0 | -3.663064 | 2.473196   | 0.997000  | H |
| H-H_ | 0 | -3.292956 | 3.988673   | 1.839482  | H |
| H-H_ | 0 | -2.261660 | 2.563588   | 2.048936  | H |
| H-H_ | 0 | 8.317321  | -7.274011  | -3.271933 | L |
| H-H_ | 0 | 10.430693 | -3.855534  | -1.538461 | L |
| H-H_ | 0 | 11.967138 | -7.969811  | -0.655635 | L |
| H-H_ | 0 | 7.219371  | -6.046647  | 0.734976  | L |
| H-H_ | 0 | 5.008107  | -6.510470  | 1.416122  | L |
| H-H_ | 0 | 3.371058  | -7.094765  | -0.194338 | L |
| H-H_ | 0 | 3.940563  | -7.211072  | -2.487448 | L |
| H-H_ | 0 | 6.143664  | -6.755587  | -3.190878 | L |
| H-H_ | 0 | 13.155277 | -7.682936  | -3.431121 | L |
| H-H_ | 0 | 13.663680 | -5.541299  | -4.210829 | L |
| H-H_ | 0 | 12.044385 | -3.857316  | -4.348169 | L |
| H-H_ | 0 | 8.766166  | -2.218018  | -3.862831 | L |
| H-H_ | 0 | 10.274421 | -2.554504  | -4.722698 | L |
| H-H_ | 0 | 11.080452 | -3.161814  | 0.524884  | L |
| H-H_ | 0 | 10.956773 | -1.474976  | -0.045819 | L |
| H-H_ | 0 | 12.931758 | -1.876889  | -1.517737 | L |
| H-H_ | 0 | 13.306293 | -1.975083  | 0.255786  | L |
| H-H_ | 0 | 14.990017 | -2.021353  | -1.810187 | L |
| H-H_ | 0 | 17.141381 | -2.476620  | -2.593048 | L |
| H-H_ | 0 | 18.024212 | -4.649448  | -2.452211 | L |
| H-H_ | 0 | 16.778467 | -6.395694  | -1.522814 | L |
| H-H_ | 0 | 15.696966 | -7.463806  | 0.328440  | L |
| H-H_ | 0 | 15.123214 | -7.957218  | -1.336926 | L |
| H-H_ | 0 | 14.209607 | -9.350170  | 0.584095  | L |
| H-H_ | 0 | 13.370526 | -7.895385  | 1.186827  | L |
| H-H_ | 0 | 12.061384 | -9.725985  | -3.619689 | L |
| H-H_ | 0 | 11.004675 | -10.523108 | -2.447047 | L |
| H-H_ | 0 | 9.439070  | 7.021805   | -1.982784 | L |
| H-H_ | 0 | 7.597984  | 10.178187  | 0.426951  | L |
| H-H_ | 0 | 6.982984  | 5.921184   | 1.677828  | L |
| H-H_ | 0 | 11.634486 | 8.465656   | 1.460496  | L |
| H-H_ | 0 | 13.986882 | 8.306117   | 1.360275  | L |
| H-H_ | 0 | 15.059654 | 7.907653   | -0.712739 | L |
| H-H_ | 0 | 13.781840 | 7.662410   | -2.691162 | L |
| H-H_ | 0 | 11.431116 | 7.815856   | -2.615143 | L |
| H-H_ | 0 | 4.931699  | 6.002997   | -0.518191 | L |
| H-H_ | 0 | 3.908323  | 8.033844   | -1.055131 | L |
| H-H_ | 0 | 5.159635  | 9.907592   | -1.688087 | L |
| H-H_ | 0 | 8.172978  | 11.964799  | -2.282442 | L |
| H-H_ | 0 | 6.522078  | 11.417594  | -2.599532 | L |
| H-H_ | 0 | 7.584327  | 10.827642  | 2.604063  | L |
| H-H_ | 0 | 7.294327  | 12.503900  | 2.061814  | L |
| H-H_ | 0 | 5.012819  | 11.818985  | 1.318093  | L |
| H-H_ | 0 | 5.262512  | 11.712588  | 3.112964  | L |
| H-H_ | 0 | 3.010570  | 11.404888  | 1.720650  | L |
| H-H_ | 0 | 0.798804  | 10.659634  | 1.684067  | L |
| H-H_ | 0 | 0.299596  | 8.394453   | 2.059970  | L |
| H-H_ | 0 | 1.996178  | 6.843678   | 2.484917  | L |
| H-H_ | 0 | 3.752797  | 5.961671   | 3.849239  | L |

|      |   |            |            |           |   |
|------|---|------------|------------|-----------|---|
| H-H_ | 0 | 3.813701   | 5.523395   | 2.075347  | L |
| H-H_ | 0 | 5.472778   | 4.291754   | 3.557659  | L |
| H-H_ | 0 | 6.271846   | 5.853248   | 3.883480  | L |
| H-H_ | 0 | 6.139607   | 4.114723   | -1.126539 | L |
| H-H_ | 0 | 7.614122   | 3.470988   | -0.391684 | L |
| H-H_ | 0 | -10.175360 | -8.502768  | -0.106693 | L |
| H-H_ | 0 | -8.061553  | -5.084127  | 1.626544  | L |
| H-H_ | 0 | -6.525682  | -9.198180  | 2.509348  | L |
| H-H_ | 0 | -11.272777 | -7.278171  | 3.900498  | L |
| H-H_ | 0 | -13.484440 | -7.740730  | 4.581510  | L |
| H-H_ | 0 | -15.122515 | -8.319407  | 2.972494  | L |
| H-H_ | 0 | -14.551649 | -8.441852  | 0.677659  | L |
| H-H_ | 0 | -12.348818 | -7.985863  | -0.025691 | L |
| H-H_ | 0 | -5.337673  | -8.911485  | -0.266693 | L |
| H-H_ | 0 | -4.829653  | -6.769741  | -1.048164 | L |
| H-H_ | 0 | -6.448421  | -5.086726  | -1.186531 | L |
| H-H_ | 0 | -9.725111  | -3.445227  | -0.703718 | L |
| H-H_ | 0 | -8.212089  | -3.783150  | -1.552535 | L |
| H-H_ | 0 | -7.411833  | -4.389349  | 3.690823  | L |
| H-H_ | 0 | -7.533785  | -2.702188  | 3.118258  | L |
| H-H_ | 0 | -5.563652  | -3.113585  | 1.643224  | L |
| H-H_ | 0 | -5.184295  | -3.199443  | 3.417518  | L |
| H-H_ | 0 | -3.505954  | -3.252859  | 1.351429  | L |
| H-H_ | 0 | -1.362904  | -3.709288  | 0.554709  | L |
| H-H_ | 0 | -0.473608  | -5.881057  | 0.702303  | L |
| H-H_ | 0 | -1.715241  | -7.624609  | 1.639731  | L |
| H-H_ | 0 | -2.795854  | -8.692143  | 3.493407  | L |
| H-H_ | 0 | -3.369751  | -9.185631  | 1.828122  | L |
| H-H_ | 0 | -4.283299  | -10.578626 | 3.749199  | L |
| H-H_ | 0 | -5.122368  | -9.123789  | 4.351896  | L |
| H-H_ | 0 | -6.431507  | -10.954400 | -0.454597 | L |
| H-H_ | 0 | -7.488235  | -11.751597 | 0.717998  | L |
| H-H_ | 0 | -11.757366 | 4.153891   | -4.438063 | L |
| H-H_ | 0 | -9.644084  | 7.572939   | -2.705095 | L |
| H-H_ | 0 | -8.107806  | 3.458826   | -1.822315 | L |
| H-H_ | 0 | -12.854945 | 5.378800   | -0.431218 | L |
| H-H_ | 0 | -15.066612 | 4.916265   | 0.249789  | L |
| H-H_ | 0 | -16.704689 | 4.337599   | -1.359226 | L |
| H-H_ | 0 | -16.133822 | 4.215139   | -3.654059 | L |
| H-H_ | 0 | -13.930974 | 4.671079   | -4.357404 | L |
| H-H_ | 0 | -6.927955  | 3.755407   | -4.571007 | L |
| H-H_ | 0 | -6.410147  | 5.888537   | -5.371811 | L |
| H-H_ | 0 | -8.030298  | 7.571540   | -5.513573 | L |
| H-H_ | 0 | -11.308378 | 9.210794   | -5.031218 | L |
| H-H_ | 0 | -9.799807  | 8.873508   | -5.889052 | L |
| H-H_ | 0 | -8.993831  | 8.266448   | -0.641698 | L |
| H-H_ | 0 | -9.117778  | 9.953732   | -1.212332 | L |
| H-H_ | 0 | -7.143200  | 9.551646   | -2.684370 | L |
| H-H_ | 0 | -6.768678  | 9.453392   | -0.910852 | L |
| H-H_ | 0 | -5.084938  | 9.407261   | -2.976554 | L |
| H-H_ | 0 | -2.933345  | 8.951990   | -3.758981 | L |
| H-H_ | 0 | -2.050148  | 6.778786   | -3.616804 | L |
| H-H_ | 0 | -3.296769  | 5.032541   | -2.689578 | L |
| H-H_ | 0 | -4.384558  | 3.972257   | -0.844173 | L |
| H-H_ | 0 | -4.958428  | 3.480508   | -2.504051 | L |
| H-H_ | 0 | -5.863442  | 2.078847   | -0.585407 | L |
| H-H_ | 0 | -6.703283  | 3.530843   | 0.021791  | L |
| H-H_ | 0 | -8.016518  | 1.715400   | -4.786990 | L |
| H-H_ | 0 | -9.068011  | 0.902754   | -3.619735 | L |
| H-H_ | 0 | 0.101607   | -0.613140  | -3.413181 | L |
| H-H_ | 0 | -1.937628  | -4.148532  | -5.001962 | L |

|      |   |           |           |           |   |
|------|---|-----------|-----------|-----------|---|
| H-H_ | 0 | -3.474076 | -0.034703 | -5.884508 | L |
| H-H_ | 0 | 1.273288  | -1.954541 | -7.276066 | L |
| H-H_ | 0 | 3.485075  | -1.492239 | -7.956946 | L |
| H-H_ | 0 | 5.123406  | -0.914645 | -6.347746 | L |
| H-H_ | 0 | 4.555409  | -0.796489 | -4.057349 | L |
| H-H_ | 0 | 2.346582  | -1.261716 | -3.356625 | L |
| H-H_ | 0 | -4.652974 | -0.329967 | -3.132865 | L |
| H-H_ | 0 | -5.170809 | -2.464257 | -2.332310 | L |
| H-H_ | 0 | -3.550833 | -4.145675 | -2.188462 | L |
| H-H_ | 0 | -0.274527 | -5.787606 | -2.673734 | L |
| H-H_ | 0 | -1.785802 | -5.449179 | -1.822138 | L |
| H-H_ | 0 | -2.587798 | -4.842084 | -7.065597 | L |
| H-H_ | 0 | -2.463924 | -6.529388 | -6.494880 | L |
| H-H_ | 0 | -4.438303 | -6.127039 | -5.022656 | L |
| H-H_ | 0 | -4.813149 | -6.029250 | -6.796225 | L |
| H-H_ | 0 | -6.495424 | -5.982156 | -4.726456 | L |
| H-H_ | 0 | -8.645723 | -5.526348 | -3.941922 | L |
| H-H_ | 0 | -9.529201 | -3.353961 | -4.084374 | L |
| H-H_ | 0 | -8.283866 | -1.607600 | -5.014757 | L |
| H-H_ | 0 | -7.207647 | -0.537668 | -6.863939 | L |
| H-H_ | 0 | -6.617779 | -0.056747 | -5.201103 | L |
| H-H_ | 0 | -5.717291 | 1.346262  | -7.122690 | L |
| H-H_ | 0 | -4.877529 | -0.107790 | -7.728125 | L |
| H-H_ | 0 | -3.566123 | 1.709291  | -2.921072 | L |
| H-H_ | 0 | -2.517364 | 2.521885  | -4.094807 | L |
| H-H_ | 0 | -0.287713 | 1.707388  | 4.959765  | H |
| H-H_ | 0 | -1.139083 | 0.860321  | 5.960311  | H |
| H-H_ | 0 | 2.002197  | 2.312130  | 8.583771  | L |
| H-H_ | 0 | -0.100285 | -1.109952 | 6.850313  | L |
| H-H_ | 0 | -1.570092 | 3.130662  | 5.911987  | L |
| H-H_ | 0 | 3.095801  | 1.091612  | 4.582782  | L |
| H-H_ | 0 | 5.312424  | 1.556510  | 3.896818  | L |
| H-H_ | 0 | 6.948883  | 2.130932  | 5.504673  | L |
| H-H_ | 0 | 6.378674  | 2.251327  | 7.800065  | L |
| H-H_ | 0 | 4.175912  | 1.794742  | 8.503529  | L |
| H-H_ | 0 | -2.835227 | 2.719745  | 8.743146  | L |
| H-H_ | 0 | -3.343651 | 0.578186  | 9.523083  | L |
| H-H_ | 0 | -1.724436 | -1.105720 | 9.660575  | L |
| H-H_ | 0 | 1.553435  | -2.745172 | 9.177180  | L |
| H-H_ | 0 | 0.044906  | -2.407981 | 10.035234 | L |
| H-H_ | 0 | -0.772428 | -1.791148 | 4.795320  | L |
| H-H_ | 0 | -0.636001 | -3.485816 | 5.354416  | L |
| H-H_ | 0 | -2.612535 | -3.087369 | 6.829371  | L |
| H-H_ | 0 | -2.984885 | -2.985786 | 5.054459  | L |
| H-H_ | 0 | -4.670565 | -2.941950 | 7.121091  | L |
| H-H_ | 0 | -6.821626 | -2.486631 | 7.904734  | L |
| H-H_ | 0 | -7.704346 | -0.313695 | 7.764281  | L |
| H-H_ | 0 | -6.458551 | 1.432507  | 6.834597  | L |
| H-H_ | 0 | -5.375790 | 2.500358  | 4.983044  | L |
| H-H_ | 0 | -4.803723 | 2.994395  | 6.649281  | L |
| H-H_ | 0 | -3.884169 | 4.385625  | 4.717266  | L |
| H-H_ | 0 | -3.051047 | 2.916347  | 4.141895  | L |
| H-H_ | 0 | -1.741204 | 4.763060  | 8.932484  | L |

f) Gaussian input files for Sample crystallized from acetone 1c)

```
%chk=koron_219_aceton.chk
%mem=4096MB
%nproc=4
# nmr oniom (b3lyp/6-311++g(d,p):uff)

Sample crystallized from acetone 1c)

0 1 0 1 0 1
O-O_3      0      8.670271      0.457323      -1.854762 L
O-O_3      0      8.896580      3.143410      -0.878332 L
O-O_3      0      5.464012      3.834671      -0.066479 L
O-O_3      0      5.958612      0.190170      1.839238 L
O-O_3      0      7.415911      -1.592798      3.081962 L
O-O_3      0     11.863214      -2.536650      3.701098 L
O-O_3      0     11.632218      -0.109932      1.063883 L
N-N_3      0     10.713233      1.106306      -1.113593 L
N-N_3      0      6.493315      1.896091      -0.620806 L
N-N_3      0     10.146840      -2.067033      2.279700 L
C-C_3      0     11.762366      0.579549      -3.786331 L
C-C_3      0     12.193955      0.249152      -5.064829 L
C-C_3      0     11.351014      -0.389097      -5.955480 L
C-C_3      0     10.065721      -0.715461      -5.566169 L
C-C_3      0      9.625964      -0.395150      -4.288824 L
C-C_3      0     10.461837      0.260945      -3.393260 L
C-C_3      0      9.883874      0.609866      -2.056048 L
C-C_3      0     10.236775      1.514391      0.168870 L
C-C_3      0     10.711200      0.878639      1.309358 L
C-C_3      0     10.241443      1.222637      2.577104 L
C-C_3      0      9.283685      2.227192      2.673161 L
C-C_3      0      8.805545      2.887889      1.560673 L
C-C_3      0      9.289614      2.542288      0.292327 L
C-C_3      0      7.734082      3.971515      -0.830483 L
C-C_3      0      6.453014      3.216540      -0.462571 L
C-C_3      0      5.346468      1.028433      -0.345655 L
C-C_3      0      4.976273      0.950200      1.120214 L
C-C_3      0      5.587366      -0.105369      3.126820 L
C-C_3      0      4.489876      0.463974      3.774591 L
C-C_3      0      4.153547      0.070049      5.069781 L
C-C_3      0      4.917084      -0.862461      5.726413 L
C-C_3      0      6.031423      -1.430417      5.089809 L
C-C_3      0      6.369364      -1.066691      3.789207 L
C-C_3      0      8.225407      -2.577322      3.746802 L
C-C_3      0      9.232758      -3.098228      2.747532 L
C-C_3      0     11.357186      -1.883401      2.785548 L
C-C_3      0     12.209484      -0.777503      2.176360 L
O-O_3      0     -8.669870      -0.457275      1.855022 L
O-O_3      0     -8.896096      -3.143393      0.878547 L
O-O_3      0     -5.463575      -3.834530      0.066742 L
O-O_3      0     -5.958127      -0.190153      -1.839023 L
O-O_3      0     -7.415426      1.592814      -3.081747 L
O-O_3      0    -11.862729      2.536667      -3.700883 L
O-O_3      0    -11.631817      0.109980      -1.063623 L
N-N_3      0    -10.712832      -1.106258      1.113853 L
N-N_3      0     -6.492830      -1.896074      0.621021 L
N-N_3      0    -10.146355      2.067049      -2.279485 L
C-C_3      0    -11.762006      -0.579482      3.786500 L
C-C_3      0    -12.193470      -0.249136      5.065044 L
C-C_3      0    -11.350613      0.389145      5.955739 L
```



|       |   |            |           |           |   |
|-------|---|------------|-----------|-----------|---|
| C-C_3 | 0 | -10.065320 | 0.715509  | 5.566428  | L |
| C-C_3 | 0 | -9.625479  | 0.395167  | 4.289039  | L |
| C-C_3 | 0 | -10.461436 | -0.260897 | 3.393520  | L |
| C-C_3 | 0 | -9.883473  | -0.609818 | 2.056307  | L |
| C-C_3 | 0 | -10.236374 | -1.514343 | -0.168611 | L |
| C-C_3 | 0 | -10.710799 | -0.878591 | -1.309099 | L |
| C-C_3 | 0 | -10.241043 | -1.222589 | -2.576845 | L |
| C-C_3 | 0 | -9.283200  | -2.227175 | -2.672946 | L |
| C-C_3 | 0 | -8.805144  | -2.887841 | -1.560413 | L |
| C-C_3 | 0 | -9.289213  | -2.542240 | -0.292068 | L |
| C-C_3 | 0 | -7.733597  | -3.971499 | 0.830698  | L |
| C-C_3 | 0 | -6.452613  | -3.216491 | 0.462830  | L |
| C-C_3 | 0 | -5.346067  | -1.028385 | 0.345914  | L |
| C-C_3 | 0 | -4.975872  | -0.950152 | -1.119955 | L |
| C-C_3 | 0 | -5.586881  | 0.105386  | -3.126605 | L |
| C-C_3 | 0 | -4.489475  | -0.463926 | -3.774332 | L |
| C-C_3 | 0 | -4.153146  | -0.070001 | -5.069522 | L |
| C-C_3 | 0 | -4.916599  | 0.862478  | -5.726198 | L |
| C-C_3 | 0 | -6.030938  | 1.430434  | -5.089594 | L |
| C-C_3 | 0 | -6.368880  | 1.066707  | -3.788992 | L |
| C-C_3 | 0 | -8.225006  | 2.577370  | -3.746543 | L |
| C-C_3 | 0 | -9.232357  | 3.098276  | -2.747273 | L |
| C-C_3 | 0 | -11.356785 | 1.883449  | -2.785289 | L |
| C-C_3 | 0 | -12.209084 | 0.777551  | -2.176100 | L |
| O-O_3 | 0 | -2.615106  | 0.125432  | 2.483075  | L |
| O-O_3 | 0 | -2.021836  | 2.414089  | 4.367312  | L |
| O-O_3 | 0 | 1.569408   | 2.487039  | 4.067912  | L |
| O-O_3 | 0 | 0.466765   | 2.417982  | 0.091869  | L |
| O-O_3 | 0 | -1.290669  | 3.364034  | -1.583079 | L |
| O-O_3 | 0 | -5.639713  | 4.215170  | -2.252617 | L |
| O-O_3 | 0 | -5.311297  | 2.808737  | 1.063505  | L |
| N-N_3 | 0 | -4.285099  | 1.495945  | 3.191127  | L |
| N-N_3 | 0 | -0.042128  | 1.406667  | 2.868920  | L |
| N-N_3 | 0 | -4.160861  | 2.702208  | -1.454162 | L |
| C-C_3 | 0 | -5.859859  | -0.865358 | 3.780465  | L |
| C-C_3 | 0 | -6.521600  | -2.007542 | 4.218666  | L |
| C-C_3 | 0 | -5.823017  | -3.190033 | 4.403359  | L |
| C-C_3 | 0 | -4.459637  | -3.240075 | 4.133604  | L |
| C-C_3 | 0 | -3.791108  | -2.106031 | 3.689649  | L |
| C-C_3 | 0 | -4.487420  | -0.904471 | 3.529488  | L |
| C-C_3 | 0 | -3.721791  | 0.284365  | 3.032725  | L |
| C-C_3 | 0 | -3.651184  | 2.682500  | 2.709020  | L |
| C-C_3 | 0 | -4.200926  | 3.383586  | 1.634915  | L |
| C-C_3 | 0 | -3.601697  | 4.555426  | 1.168773  | L |
| C-C_3 | 0 | -2.405095  | 4.967829  | 1.742807  | L |
| C-C_3 | 0 | -1.818676  | 4.270007  | 2.778233  | L |
| C-C_3 | 0 | -2.465656  | 3.143640  | 3.297158  | L |
| C-C_3 | 0 | -0.692900  | 2.668002  | 4.831294  | L |
| C-C_3 | 0 | 0.385953   | 2.174745  | 3.874953  | L |
| C-C_3 | 0 | 0.858710   | 0.840044  | 1.870691  | L |
| C-C_3 | 0 | 1.470066   | 1.875254  | 0.954846  | L |
| C-C_3 | 0 | 0.889712   | 3.439834  | -0.724192 | L |
| C-C_3 | 0 | 2.196089   | 3.928655  | -0.748160 | L |
| C-C_3 | 0 | 2.522132   | 4.993063  | -1.597726 | L |
| C-C_3 | 0 | 1.567509   | 5.574640  | -2.376573 | L |
| C-C_3 | 0 | 0.257485   | 5.072348  | -2.389394 | L |
| C-C_3 | 0 | -0.071425  | 3.988834  | -1.577930 | L |
| C-C_3 | 0 | -2.248613  | 3.810603  | -2.545153 | L |
| C-C_3 | 0 | -3.331629  | 2.750348  | -2.649533 | L |
| C-C_3 | 0 | -5.221860  | 3.500873  | -1.336182 | L |
| C-C_3 | 0 | -5.954544  | 3.513798  | 0.000132  | L |

|       |   |           |           |           |   |
|-------|---|-----------|-----------|-----------|---|
| O-O_3 | 0 | 2.615505  | -0.125381 | -2.482809 | H |
| O-O_3 | 0 | 2.022323  | -2.414072 | -4.367097 | H |
| O-O_3 | 0 | -1.569050 | -2.486973 | -4.067741 | H |
| O-O_3 | 0 | -0.466362 | -2.417927 | -0.091616 | H |
| O-O_3 | 0 | 1.291159  | -3.364029 | 1.583296  | H |
| O-O_3 | 0 | 5.640116  | -4.215124 | 2.252875  | H |
| O-O_3 | 0 | 5.311697  | -2.808691 | -1.063245 | H |
| N-N_3 | 0 | 4.285583  | -1.495926 | -3.190911 | H |
| N-N_3 | 0 | 0.042533  | -1.406619 | -2.868662 | H |
| N-N_3 | 0 | 4.161303  | -2.702169 | 1.454291  | H |
| C-C_3 | 0 | 5.860222  | 0.865423  | -3.780295 | H |
| C-C_3 | 0 | 6.522001  | 2.007591  | -4.218407 | H |
| C-C_3 | 0 | 5.823502  | 3.190050  | -4.403143 | H |
| C-C_3 | 0 | 4.460036  | 3.240124  | -4.133343 | H |
| C-C_3 | 0 | 3.791592  | 2.106047  | -3.689433 | H |
| C-C_3 | 0 | 4.487821  | 0.904517  | -3.529230 | H |
| C-C_3 | 0 | 3.722275  | -0.284344 | -3.032513 | H |
| C-C_3 | 0 | 3.651669  | -2.682484 | -2.708805 | H |
| C-C_3 | 0 | 4.201328  | -3.383540 | -1.634656 | H |
| C-C_3 | 0 | 3.602098  | -4.555379 | -1.168514 | H |
| C-C_3 | 0 | 2.405496  | -4.967782 | -1.742549 | H |
| C-C_3 | 0 | 1.819161  | -4.269989 | -2.778017 | H |
| C-C_3 | 0 | 2.466140  | -3.143623 | -3.296944 | H |
| C-C_3 | 0 | 0.693300  | -2.667955 | -4.831034 | H |
| C-C_3 | 0 | -0.385469 | -2.174724 | -3.874739 | H |
| C-C_3 | 0 | -0.858226 | -0.840038 | -1.870482 | H |
| C-C_3 | 0 | -1.469665 | -1.875210 | -0.954590 | H |
| C-C_3 | 0 | -0.889314 | -3.439783 | 0.724453  | H |
| C-C_3 | 0 | -2.195607 | -3.928634 | 0.748379  | H |
| C-C_3 | 0 | -2.521771 | -4.992997 | 1.597896  | H |
| C-C_3 | 0 | -1.567024 | -5.574624 | 2.376786  | H |
| C-C_3 | 0 | -0.257000 | -5.072328 | 2.389608  | H |
| C-C_3 | 0 | 0.071827  | -3.988788 | 1.578188  | H |
| C-C_3 | 0 | 2.249012  | -3.810551 | 2.545416  | H |
| C-C_3 | 0 | 3.332030  | -2.750301 | 2.649790  | H |
| C-C_3 | 0 | 5.222259  | -3.500824 | 1.336442  | H |
| C-C_3 | 0 | 5.954948  | -3.513745 | 0.000127  | H |
| O-O_3 | 0 | 8.247373  | -1.209358 | 0.361931  | L |
| O-O_3 | 0 | -8.246889 | 1.209374  | -0.361716 | L |
| O-O_3 | 0 | 4.699151  | 5.600920  | 1.937738  | L |
| O-O_3 | 0 | -4.698790 | -5.600855 | -1.937567 | H |
| O-O_3 | 0 | -2.337065 | 1.164491  | -0.029717 | L |
| O-O_3 | 0 | 2.337550  | -1.164470 | 0.029933  | H |
| O-O_3 | 0 | -7.765314 | 5.869360  | -2.385192 | L |
| O-O_3 | 0 | 7.765797  | -5.869344 | 2.385407  | H |
| O-O_3 | 0 | 2.822836  | 5.098926  | 3.914563  | L |
| O-O_3 | 0 | -2.822349 | -5.098908 | -3.914349 | H |
| O-O_3 | 0 | -0.281953 | 8.864561  | 1.473877  | L |
| C-C_3 | 0 | 0.804337  | 8.336265  | 1.650533  | L |
| C-C_3 | 0 | 1.001507  | 6.892334  | 1.244264  | L |
| C-C_3 | 0 | 1.963011  | 9.084957  | 2.225067  | L |
| O-O_3 | 0 | 0.282439  | -8.864544 | -1.473661 | H |
| C-C_3 | 0 | -0.803900 | -8.336121 | -1.650272 | H |
| C-C_3 | 0 | -1.001106 | -6.892287 | -1.244007 | H |
| C-C_3 | 0 | -1.962528 | -9.084941 | -2.224852 | H |
| H-H_  | 0 | -2.111498 | -8.795168 | -3.274434 | H |
| H-H_  | 0 | 11.630415 | 1.254558  | -1.293753 | L |
| H-H_  | 0 | 6.945958  | 1.659857  | -1.508491 | L |
| H-H_  | 0 | 10.043266 | -1.778358 | 1.397305  | L |
| H-H_  | 0 | 12.424651 | 0.200098  | -3.128056 | L |
| H-H_  | 0 | 12.645988 | 1.036234  | -5.503063 | L |

|      |   |            |           |           |   |
|------|---|------------|-----------|-----------|---|
| H-H_ | 0 | 11.809399  | -1.184588 | -6.371308 | L |
| H-H_ | 0 | 9.397054   | -0.412964 | -6.256783 | L |
| H-H_ | 0 | 9.181417   | -1.301243 | -3.822329 | L |
| H-H_ | 0 | 9.894400   | 0.413973  | 3.064410  | L |
| H-H_ | 0 | 9.456766   | 2.832482  | 3.462628  | L |
| H-H_ | 0 | 8.909028   | 3.986751  | 1.705201  | L |
| H-H_ | 0 | 7.877444   | 4.743714  | -0.198031 | L |
| H-H_ | 0 | 7.584584   | 4.413207  | -1.837668 | L |
| H-H_ | 0 | 5.557392   | 0.002305  | -0.715962 | L |
| H-H_ | 0 | 4.464507   | 1.413858  | -0.897003 | L |
| H-H_ | 0 | 4.882913   | 1.974274  | 1.539079  | L |
| H-H_ | 0 | 3.998220   | 0.433118  | 1.186448  | L |
| H-H_ | 0 | 4.577483   | 1.570714  | 3.772704  | L |
| H-H_ | 0 | 3.065491   | -0.152377 | 5.132483  | L |
| H-H_ | 0 | 4.300073   | -1.654168 | 6.205564  | L |
| H-H_ | 0 | 6.827175   | -1.330389 | 5.699418  | L |
| H-H_ | 0 | 8.768998   | -2.119168 | 4.602285  | L |
| H-H_ | 0 | 7.598250   | -3.423352 | 4.105963  | L |
| H-H_ | 0 | 8.742165   | -3.488740 | 1.957201  | L |
| H-H_ | 0 | 9.798004   | -3.933736 | 3.216594  | L |
| H-H_ | 0 | 12.502622  | -0.051760 | 2.967628  | L |
| H-H_ | 0 | 13.067231  | -1.199803 | 1.857771  | L |
| H-H_ | 0 | -11.630017 | -1.254495 | 1.294004  | L |
| H-H_ | 0 | -6.945532  | -1.659734 | 1.508632  | L |
| H-H_ | 0 | -10.051412 | 1.793251  | -1.390681 | L |
| H-H_ | 0 | -12.424243 | -0.199837 | 3.128287  | L |
| H-H_ | 0 | -12.645540 | -1.036204 | 5.503263  | L |
| H-H_ | 0 | -11.809029 | 1.184673  | 6.371462  | L |
| H-H_ | 0 | -9.396656  | 0.413084  | 6.257076  | L |
| H-H_ | 0 | -9.180951  | 1.301263  | 3.822533  | L |
| H-H_ | 0 | -9.894654  | -0.414009 | -3.064760 | L |
| H-H_ | 0 | -9.456350  | -2.832508 | -3.462363 | L |
| H-H_ | 0 | -8.908549  | -3.986711 | -1.704937 | L |
| H-H_ | 0 | -7.876932  | -4.743672 | 0.198209  | L |
| H-H_ | 0 | -7.584102  | -4.413212 | 1.837873  | L |
| H-H_ | 0 | -5.553137  | -0.002597 | 0.718435  | L |
| H-H_ | 0 | -4.464133  | -1.415454 | 0.896228  | L |
| H-H_ | 0 | -4.882689  | -1.974253 | -1.538810 | L |
| H-H_ | 0 | -3.997800  | -0.433287 | -1.186472 | L |
| H-H_ | 0 | -4.577083  | -1.570667 | -3.772434 | L |
| H-H_ | 0 | -3.065063  | 0.152275  | -5.132296 | L |
| H-H_ | 0 | -4.299537  | 1.654217  | -6.205231 | L |
| H-H_ | 0 | -6.826695  | 1.330417  | -5.699199 | L |
| H-H_ | 0 | -8.768517  | 2.119316  | -4.602128 | L |
| H-H_ | 0 | -7.597960  | 3.423745  | -4.105333 | L |
| H-H_ | 0 | -8.741353  | 3.489199  | -1.957398 | L |
| H-H_ | 0 | -9.797615  | 3.933846  | -3.216233 | L |
| H-H_ | 0 | -12.502227 | 0.051809  | -2.967366 | L |
| H-H_ | 0 | -13.066826 | 1.199856  | -1.857511 | L |
| H-H_ | 0 | -5.262509  | 1.548906  | 3.395954  | L |
| H-H_ | 0 | -0.989994  | 1.033102  | 2.839584  | L |
| H-H_ | 0 | -3.727297  | 2.209495  | -0.674050 | L |
| H-H_ | 0 | -6.419650  | 0.069956  | 3.636434  | L |
| H-H_ | 0 | -7.599062  | -1.969116 | 4.412055  | L |
| H-H_ | 0 | -6.346133  | -4.087231 | 4.751181  | L |
| H-H_ | 0 | -3.908961  | -4.180465 | 4.252736  | L |
| H-H_ | 0 | -2.718982  | -2.161008 | 3.458957  | L |
| H-H_ | 0 | -4.037690  | 5.146860  | 0.353635  | L |
| H-H_ | 0 | -1.881815  | 5.856980  | 1.352620  | L |
| H-H_ | 0 | -0.864948  | 4.618671  | 3.199234  | L |
| H-H_ | 0 | -0.546900  | 3.740542  | 5.070800  | L |

|      |   |           |           |           |   |
|------|---|-----------|-----------|-----------|---|
| H-H_ | 0 | -0.687381 | 2.095836  | 5.775720  | L |
| H-H_ | 0 | 1.685917  | 0.282818  | 2.364863  | L |
| H-H_ | 0 | 0.280256  | 0.090007  | 1.285168  | L |
| H-H_ | 0 | 2.205312  | 1.386528  | 0.288342  | L |
| H-H_ | 0 | 1.989841  | 2.684392  | 1.510985  | L |
| H-H_ | 0 | 2.961594  | 3.508699  | -0.086175 | L |
| H-H_ | 0 | 3.554422  | 5.359723  | -1.613445 | L |
| H-H_ | 0 | 1.812990  | 6.427998  | -3.017930 | L |
| H-H_ | 0 | -0.485282 | 5.533986  | -3.051403 | L |
| H-H_ | 0 | -1.769718 | 3.966675  | -3.533642 | L |
| H-H_ | 0 | -2.651011 | 4.790445  | -2.217094 | L |
| H-H_ | 0 | -3.945260 | 2.950433  | -3.552545 | L |
| H-H_ | 0 | -2.882782 | 1.742279  | -2.787730 | L |
| H-H_ | 0 | -6.958089 | 3.096829  | -0.053064 | L |
| H-H_ | 0 | -6.108304 | 4.577166  | 0.297370  | L |
| H-H_ | 0 | 5.257878  | -1.552507 | -3.417077 | H |
| H-H_ | 0 | 0.989909  | -1.032504 | -2.840377 | H |
| H-H_ | 0 | 3.721354  | -2.219607 | 0.671239  | H |
| H-H_ | 0 | 6.419529  | -0.070792 | -3.640774 | H |
| H-H_ | 0 | 7.599279  | 1.968737  | -4.413184 | H |
| H-H_ | 0 | 6.346562  | 4.087047  | -4.751689 | H |
| H-H_ | 0 | 3.909245  | 4.180403  | -4.252932 | H |
| H-H_ | 0 | 2.719305  | 2.160759  | -3.459140 | H |
| H-H_ | 0 | 4.034530  | -5.145931 | -0.351182 | H |
| H-H_ | 0 | 1.885071  | -5.857273 | -1.350101 | H |
| H-H_ | 0 | 0.865453  | -4.618383 | -3.199278 | H |
| H-H_ | 0 | 0.547416  | -3.740571 | -5.070329 | H |
| H-H_ | 0 | 0.687873  | -2.095994 | -5.775573 | H |
| H-H_ | 0 | -1.685482 | -0.282803 | -2.364586 | H |
| H-H_ | 0 | -0.280016 | -0.089907 | -1.284794 | H |
| H-H_ | 0 | -2.205361 | -1.386974 | -0.288254 | H |
| H-H_ | 0 | -1.989356 | -2.684434 | -1.510666 | H |
| H-H_ | 0 | -2.961196 | -3.508828 | 0.086287  | H |
| H-H_ | 0 | -3.554077 | -5.359753 | 1.613287  | H |
| H-H_ | 0 | -1.812388 | -6.428189 | 3.017861  | H |
| H-H_ | 0 | 0.485799  | -5.534144 | 3.051399  | H |
| H-H_ | 0 | 1.770019  | -3.966613 | 3.533787  | H |
| H-H_ | 0 | 2.651468  | -4.790374 | 2.217293  | H |
| H-H_ | 0 | 3.945897  | -2.950289 | 3.552632  | H |
| H-H_ | 0 | 2.883209  | -1.742249 | 2.787809  | H |
| H-H_ | 0 | 6.910353  | -2.959488 | 0.070376  | H |
| H-H_ | 0 | 6.198749  | -4.554312 | -0.297039 | H |
| H-H_ | 0 | 7.524268  | -1.371223 | -0.237215 | L |
| H-H_ | 0 | 8.149518  | -0.333189 | 0.713745  | L |
| H-H_ | 0 | -7.639976 | 1.062109  | 0.279293  | L |
| H-H_ | 0 | -8.246951 | 0.366325  | -0.878096 | L |
| H-H_ | 0 | 4.336891  | 6.463114  | 1.752369  | L |
| H-H_ | 0 | 5.530478  | 5.719750  | 2.386201  | L |
| H-H_ | 0 | -4.419113 | -6.501016 | -1.796338 | H |
| H-H_ | 0 | -5.547608 | -5.619350 | -2.368359 | H |
| H-H_ | 0 | -1.470243 | 1.564837  | -0.003040 | L |
| H-H_ | 0 | -2.495711 | 0.737117  | 0.816681  | L |
| H-H_ | 0 | 1.472437  | -1.569264 | 0.030724  | H |
| H-H_ | 0 | 2.474907  | -0.750399 | -0.826265 | H |
| H-H_ | 0 | -7.014728 | 5.328424  | -2.129864 | L |
| H-H_ | 0 | -7.748400 | 5.956116  | -3.331110 | L |
| H-H_ | 0 | 7.025945  | -5.316408 | 2.125456  | H |
| H-H_ | 0 | 7.773717  | -5.911656 | 3.334443  | H |
| H-H_ | 0 | 2.432130  | 4.226256  | 4.028435  | L |
| H-H_ | 0 | 3.477661  | 5.040668  | 3.213791  | L |
| H-H_ | 0 | -2.434926 | -4.224268 | -4.024101 | H |

|      |   |           |            |           |   |
|------|---|-----------|------------|-----------|---|
| H-H_ | 0 | -3.463421 | -5.051296  | -3.200306 | H |
| H-H_ | 0 | 1.436880  | 6.828796   | 0.236253  | L |
| H-H_ | 0 | 0.045410  | 6.338621   | 1.229026  | L |
| H-H_ | 0 | 1.681008  | 6.370631   | 1.934099  | L |
| H-H_ | 0 | 1.822865  | 10.173257  | 2.199946  | L |
| H-H_ | 0 | 2.888082  | 8.848134   | 1.682664  | L |
| H-H_ | 0 | 2.113885  | 8.791981   | 3.273515  | L |
| H-H_ | 0 | -1.591598 | -6.820144  | -0.319853 | H |
| H-H_ | 0 | -0.039152 | -6.378572  | -1.070479 | H |
| H-H_ | 0 | -1.533779 | -6.336252  | -2.029971 | H |
| H-H_ | 0 | -1.823343 | -10.173340 | -2.196210 | H |
| H-H_ | 0 | -2.888277 | -8.845763  | -1.684601 | H |
